# Supplementary material for: Functionalization of 10-azacorroles: nitration, bromination and acylation
Source: Royal Society of Chemistry journal article supplement (doi:10.1039/d3qo00805c), 2023-01-01
Supplement: d3qo00805c1.pdf [file d3qo00805c1.pdf]

**Electronic Supporting Information**

**Functionalization of 10-azacorroles: nitration, bromination and acylation**

Sha Li, Yuhuan Zhu, Xiaofang Li,\* Shaowei Zhang,\* Michał J. Białek, and Piotr J. Chmielewski\*

Key Laboratory of Theoretical Organic Chemistry and Functional Molecules, Ministry of Education,  
School of Chemistry and Chemical Engineering, Hunan University of Science and Technology,  
Xiangtan, Hunan 411201, China

E-mail: [lixiaofang@iccas.ac.cn](mailto:lixiaofang@iccas.ac.cn), [swzhang@hnust.edu.cn](mailto:swzhang@hnust.edu.cn), [piotr.chmielewski@uwr.edu.pl](mailto:piotr.chmielewski@uwr.edu.pl)

## Table of contents

**Figs. S1-S2** NMR spectra of **2a**.  
**Figs. S3-S4** NMR spectra of **2b**.  
**Figs. S5-S6** NMR spectra of **3a**.  
**Figs. S7-S8** NMR spectra of **3b**.  
**Figs. S9-S10** NMR spectra of **4a**.  
**Figs. S11-S12** NMR spectra of **4b**.  
**Figs. S13-S18** NMR spectra of **5a**.  
**Figs. S19-S20** NMR spectra of **5b**.  
**Figs. S21-S22** NMR spectra of **5c**.  
**Figs. S23-S24** NMR spectra of **5d**.  
**Fig. S25** HRMS spectrum of **2a**.  
**Fig. S26** HRMS spectrum of **2b**.  
**Fig. S27** HRMS spectrum of **3a**.  
**Fig. S28** HRMS spectrum of **3b**.  
**Fig. S29** HRMS spectrum of **4a**.  
**Fig. S30** HRMS spectrum of **4b**.  
**Fig. S31** HRMS spectrum of **5a**.  
**Fig. S32** HRMS spectrum of **5b**.  
**Fig. S33** HRMS spectrum of **5c**.  
**Fig. S34** HRMS spectrum of **5d**.  
**Fig. S35** UV-vis spectrum of **2a**.  
**Fig. S36** UV-vis spectrum of **2b**.  
**Fig. S37** UV-vis spectrum of **3a**.  
**Fig. S38** UV-vis spectrum of **3b**.  
**Fig. S39** UV-vis spectrum of **4a**.  
**Fig. S40** UV-vis spectrum of **4b**.  
**Fig. S41** UV-vis spectrum of **5a**.  
**Fig. S42** UV-vis spectrum of **5b**.  
**Fig. S43** UV-vis spectrum of **5c**.  
**Fig. S44** UV-vis spectrum of **5d**.  
**Fig. S45** Kohn-Sham frontier orbital distributions in **1a**.  
**Fig. S46** Electrostatic potential and charge distribution in **1a** calculated by NBO approach.  
**Fig. S47** Calculated and experimental UV-Vis spectra for **1a-5a**.  
**Fig. S48** Cyclic and differential pulse voltammograms for **2a**.  
**Fig. S49** Cyclic and differential pulse voltammograms for **2b**.  
**Fig. S50** Cyclic and differential pulse voltammograms for **3a**.  
**Fig. S51** Cyclic and differential pulse voltammograms for **3b**.  
**Fig. S52** Cyclic and differential pulse voltammograms for **4a**.  
**Fig. S53** Cyclic and differential pulse voltammograms for **4b**.  
**Fig. S54** Cyclic and differential pulse voltammograms for **5a**.  
**Fig. S55** Cyclic and differential pulse voltammograms for **5b**.  
**Fig. S56** Cyclic and differential pulse voltammograms for **5c**.  
**Fig. S57** Cyclic and differential pulse voltammograms for **5d**.  
**Table S1**. Electrochemical data for the 10-azacorrole derivatives.  
**Table S2**. Electronic transitions calculated for **1a**.  
**Table S3**. Electronic transitions calculated for **2a**.  
**Table S4**. Electronic transitions calculated for **3a**.  
**Table S5**. Electronic transitions calculated for **4a**.  
**Table S6**. Electronic transitions calculated for **5a**.  
**Fig. S56**. Correlations of calculated HOMO energy with the first oxidation potentials for the compounds **1a-5a**.  
**Fig. S57**. Correlations of calculated LUMO energy with the first reduction potentials for the compounds **1a-5a**.  
**Table S7**. Computational details for the optimized structures of compounds.  
**Figure S58** DFT optimized models and relative energies of possible cationic intermediates

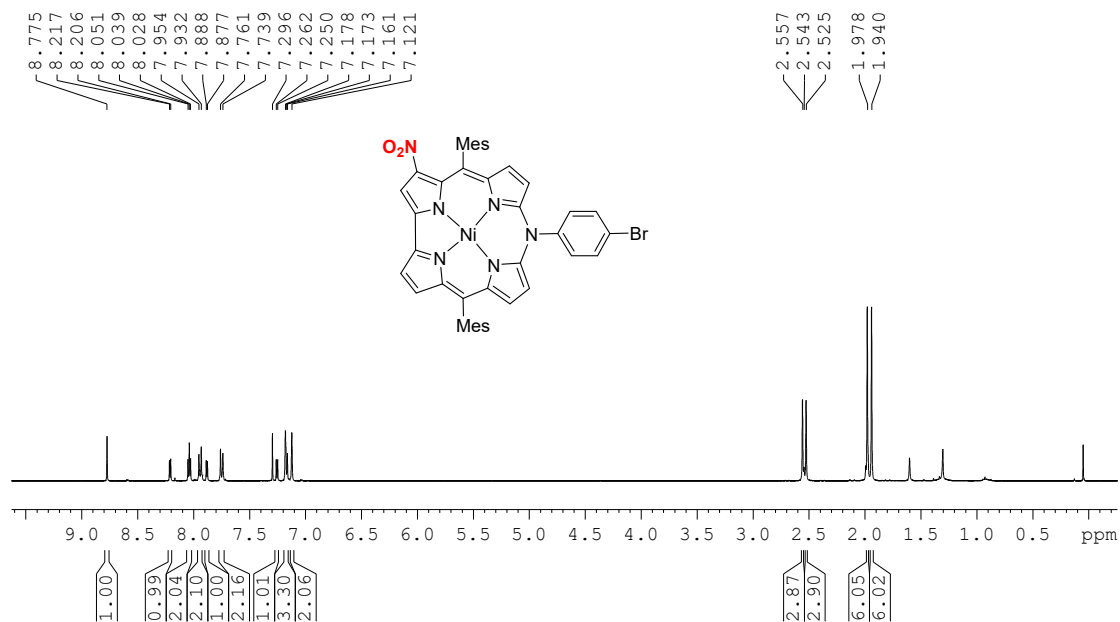

Figure S1. <sup>1</sup>H NMR spectrum of **2a** (400 MHz, 298 K, CDCl<sub>3</sub>).

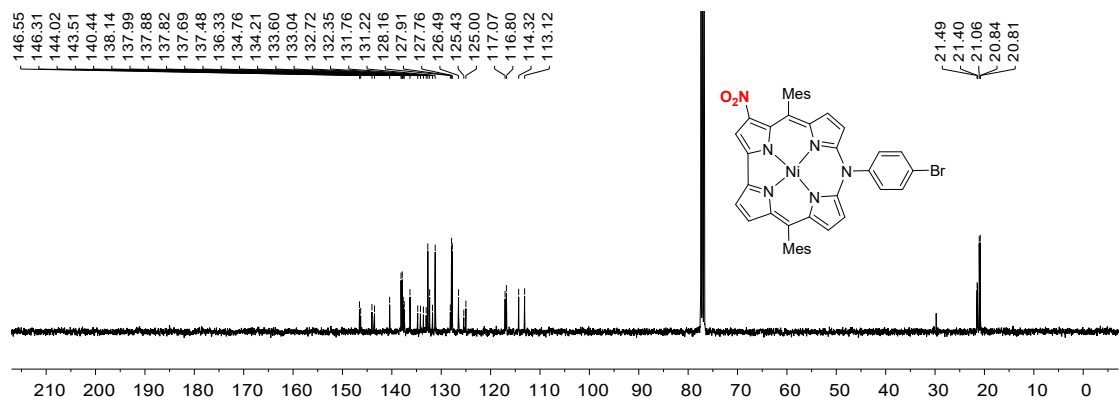

Figure S2. <sup>13</sup>C NMR spectrum of **2a** (100 MHz, 298 K, CDCl<sub>3</sub>).

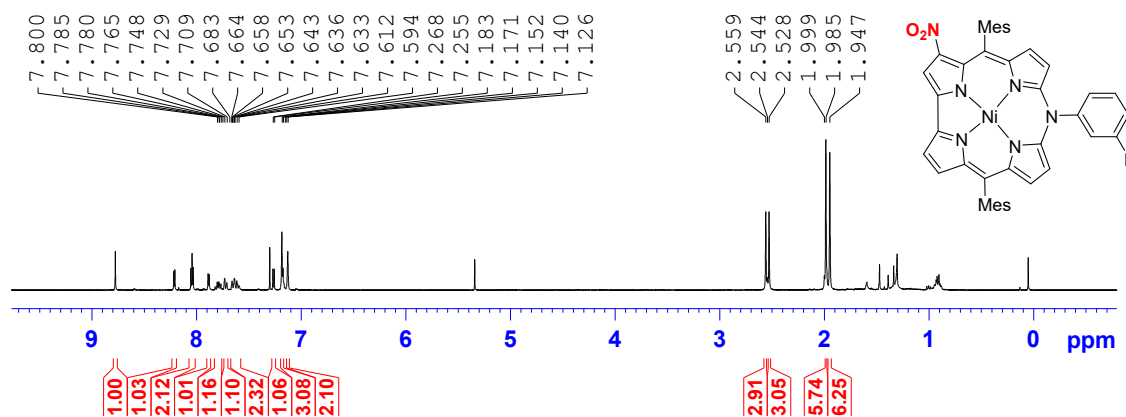

Figure S3.  $^1\text{H}$  NMR spectrum of **2b** (400 MHz, 298 K,  $\text{CDCl}_3$ ).

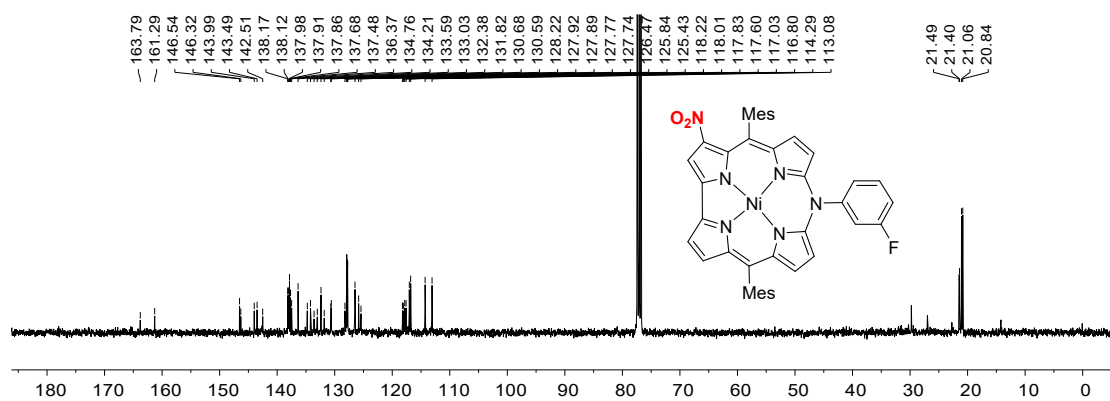

Figure S4.  $^{13}\text{C}$  NMR spectrum of **2b** (100 MHz, 298 K,  $\text{CDCl}_3$ ).

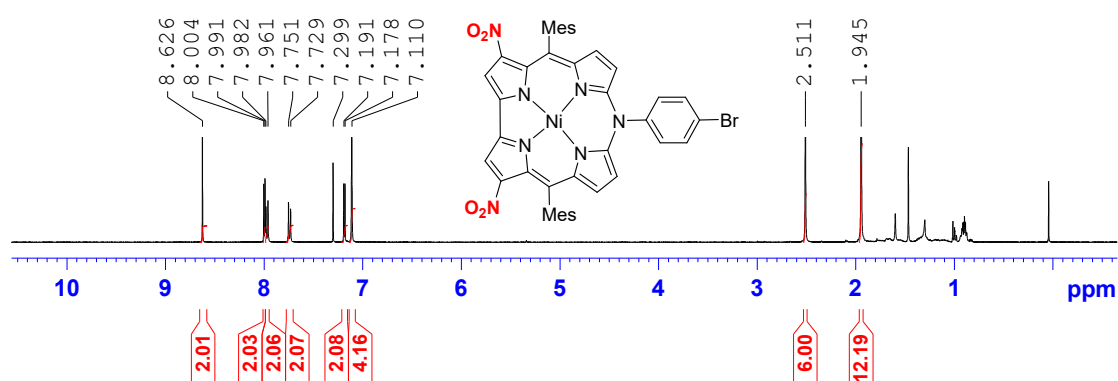

Figure S5.  $^1\text{H}$  spectrum of **3a** (400 MHz, 298 K,  $\text{CDCl}_3$ ).

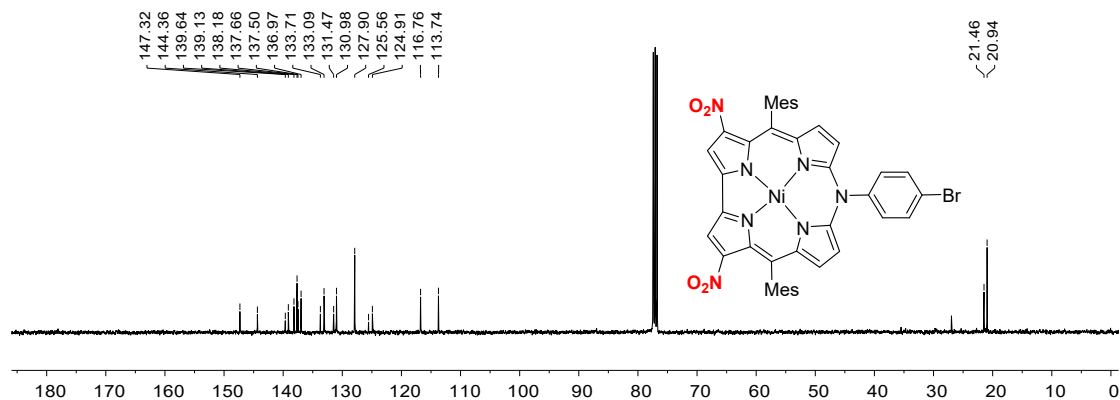

Figure S6.  $^{13}\text{C}$  spectrum of **3a** (100 MHz, 298 K,  $\text{CDCl}_3$ ).

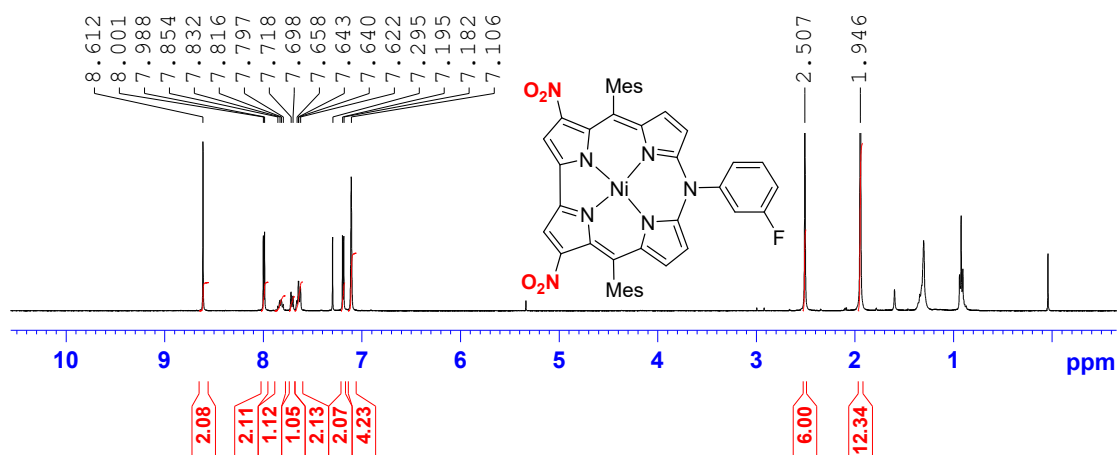

Figure S7.  $^1\text{H}$  NMR spectrum of **3b** (400 MHz, 298 K,  $\text{CDCl}_3$ ).

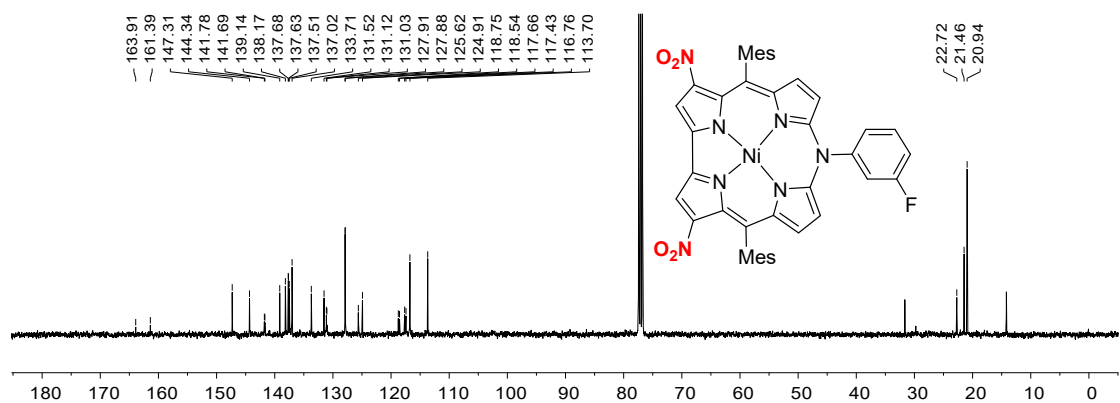

Figure S8.  $^{13}\text{C}$  NMR spectrum of **3b** (100 MHz, 298 K,  $\text{CDCl}_3$ ).

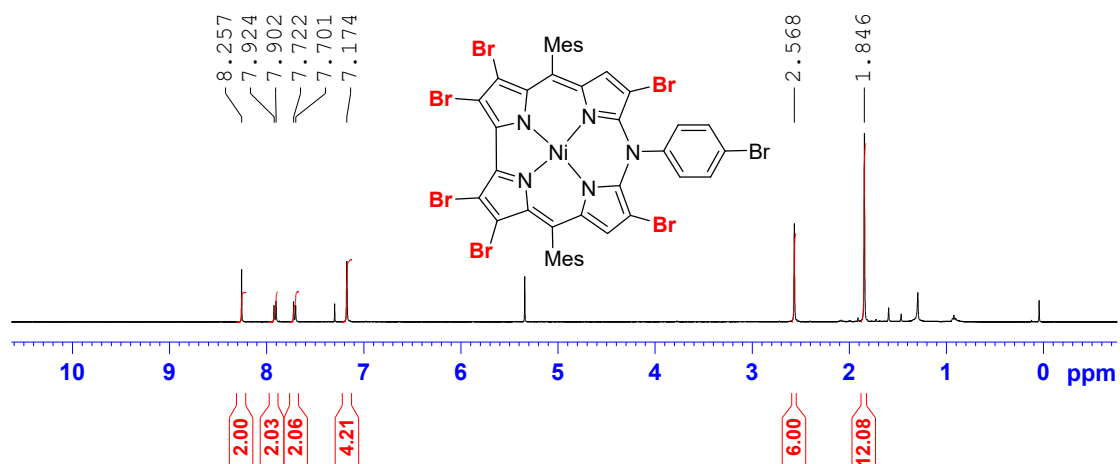

Figure S9.  $^1\text{H}$  spectrum of 4a (400 MHz, 298 K,  $\text{CDCl}_3$ ).

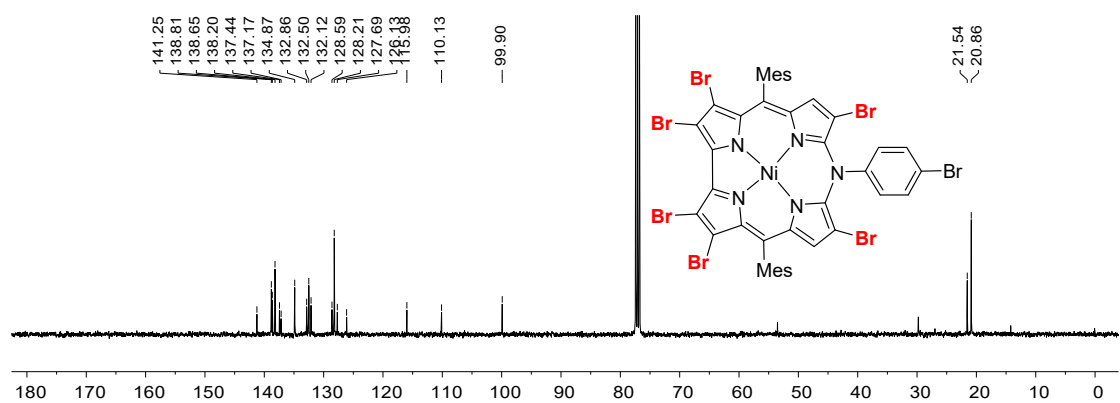

Figure S10.  $^{13}\text{C}$  spectrum of 4a (100 MHz, 298 K,  $\text{CDCl}_3$ ).

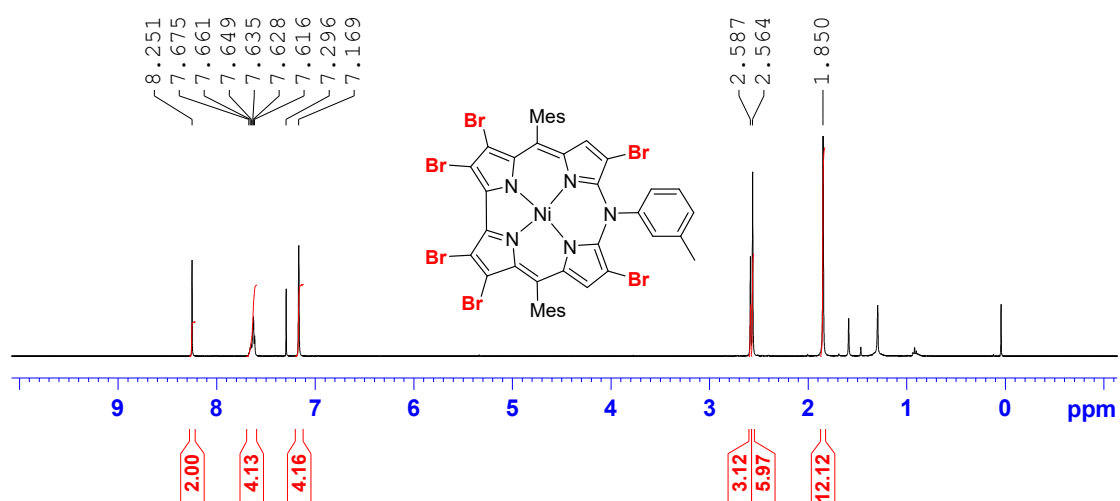

Figure S11.  $^1\text{H}$  spectrum of 4b (400 MHz, 298 K,  $\text{CDCl}_3$ ).

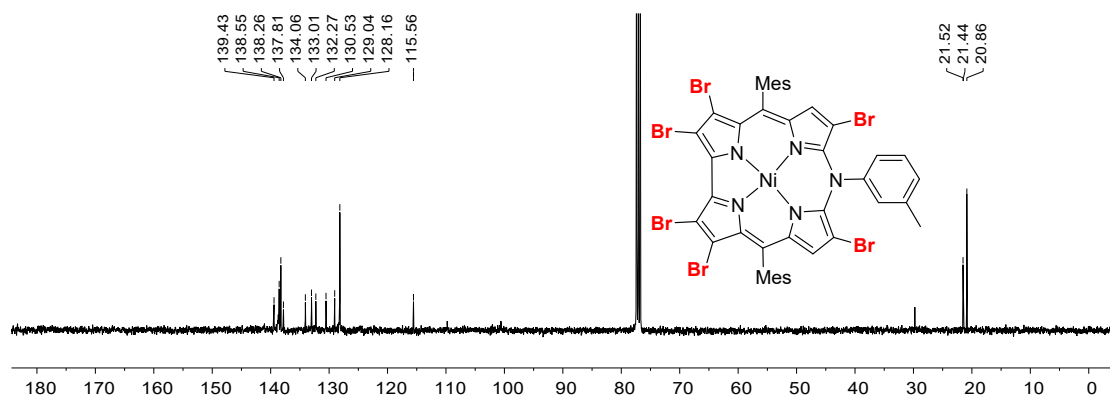

Figure S12.  $^{13}\text{C}$  spectrum of **4b** (100 MHz, 298 K,  $\text{CDCl}_3$ ).

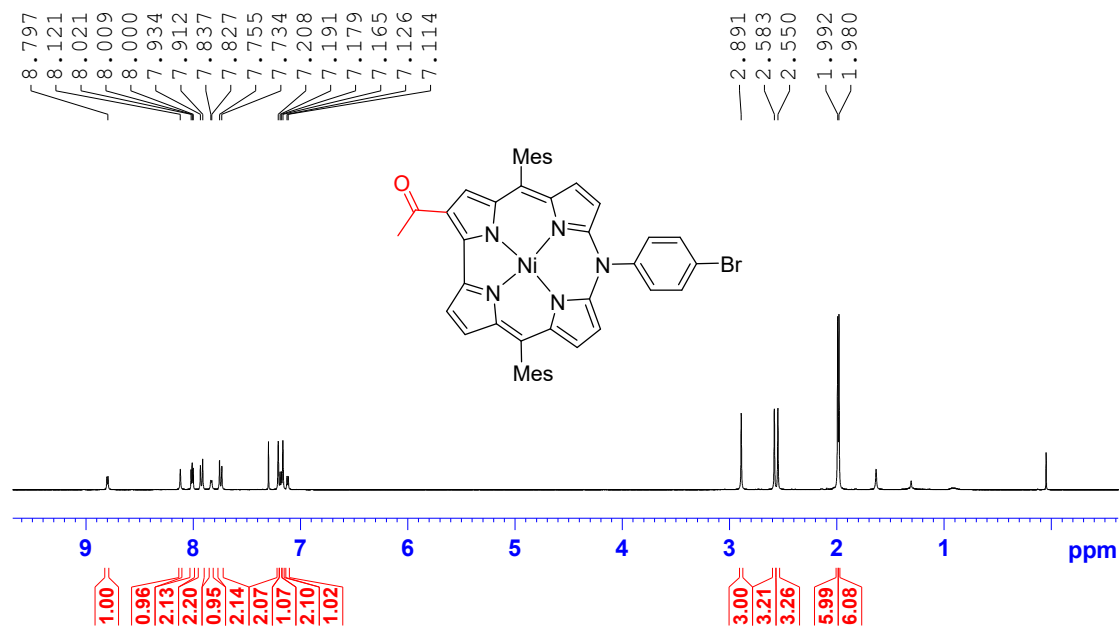

Figure S13.  $^1\text{H}$  NMR spectrum of **5a** (400 MHz, 298 K,  $\text{CDCl}_3$ ).

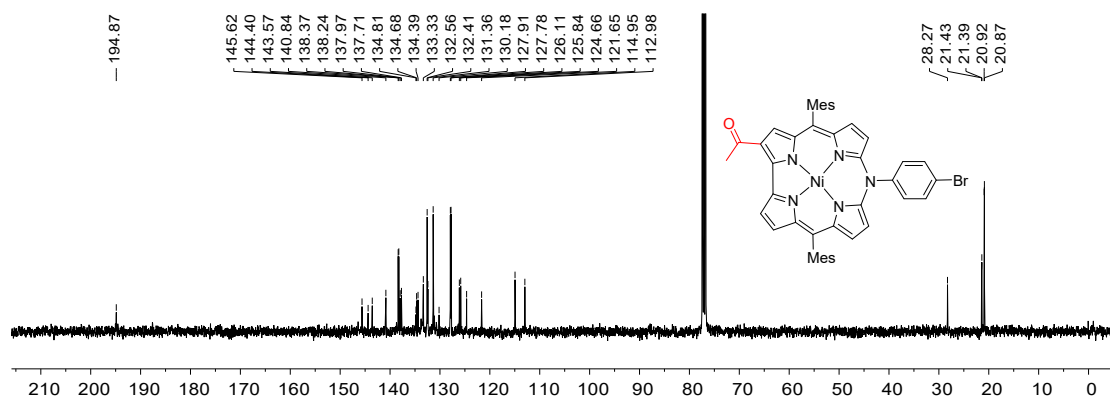

Figure S14.  $^{13}\text{C}$  NMR spectrum of **5a** (100 MHz, 298 K,  $\text{CDCl}_3$ ).

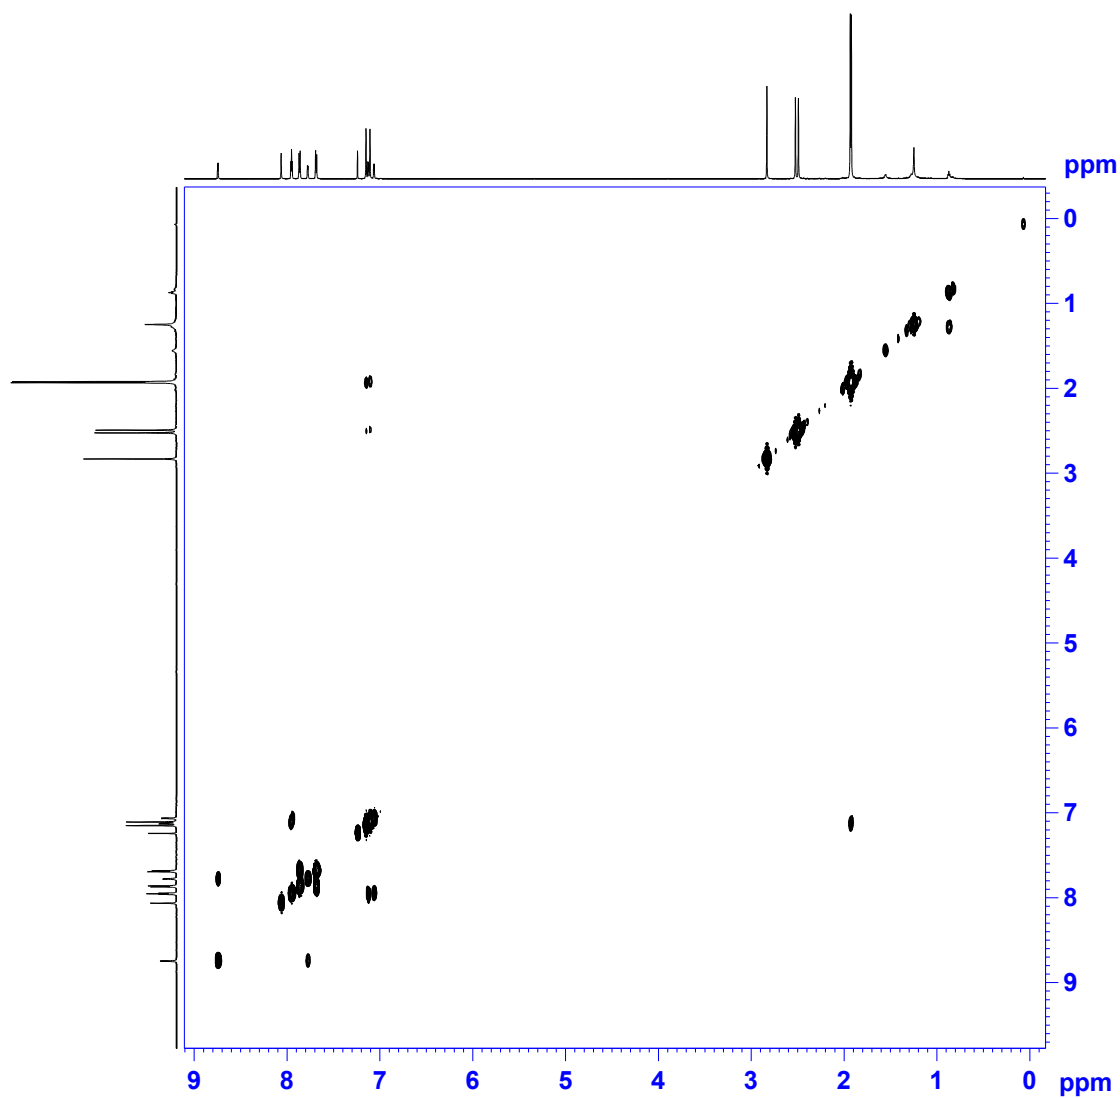

Figure S15.  $^1\text{H}$ ,  $^1\text{H}$  COSY spectrum of **5a** (700 MHz, 298 K,  $\text{CDCl}_3$ ).



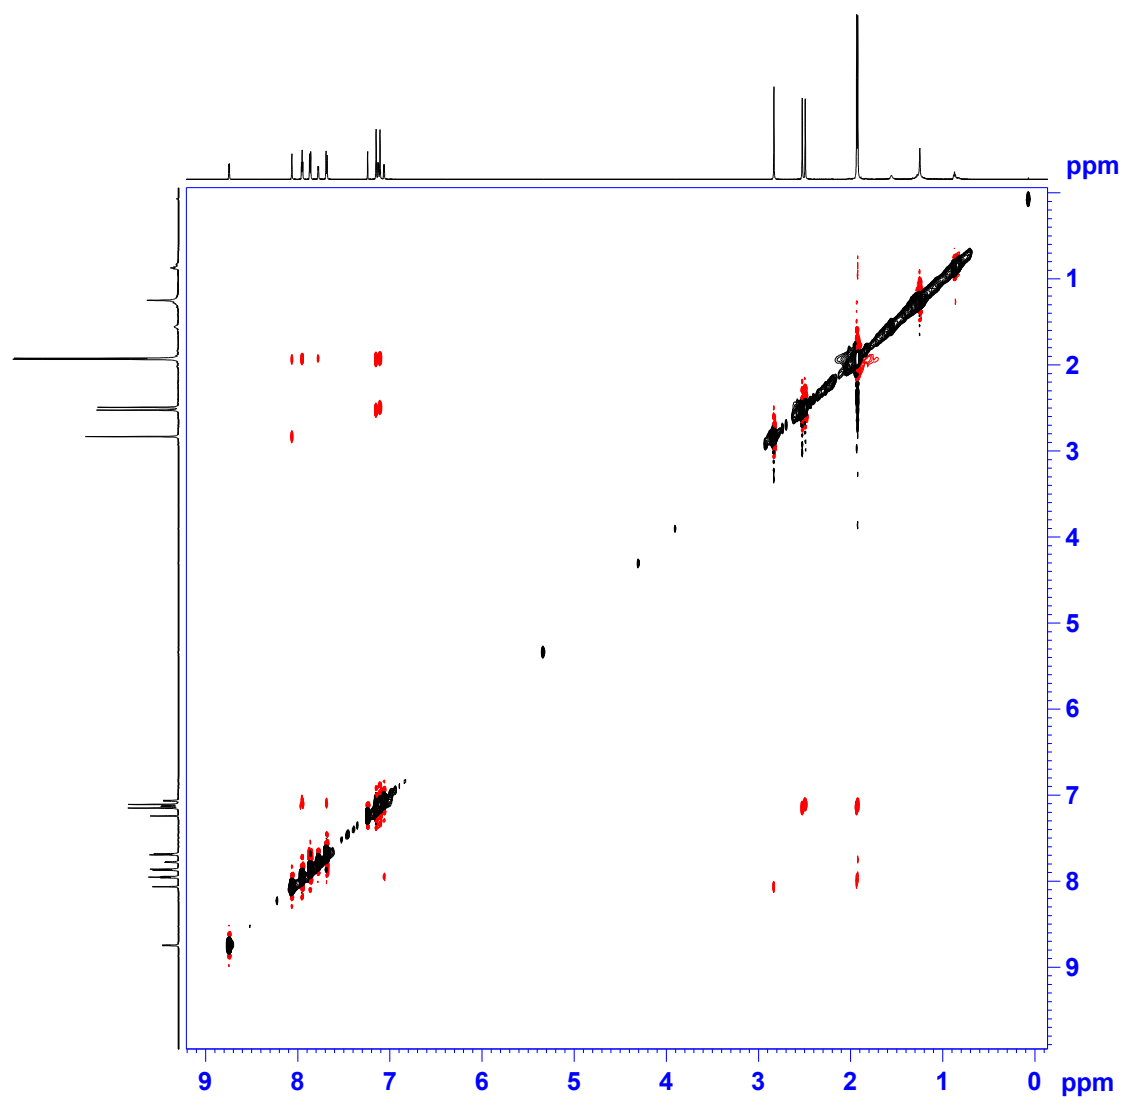

**Figure S16.** <sup>1</sup>H, <sup>1</sup>H NOESY spectrum of **5a** (700 MHz, 298 K, CDCl<sub>3</sub>).

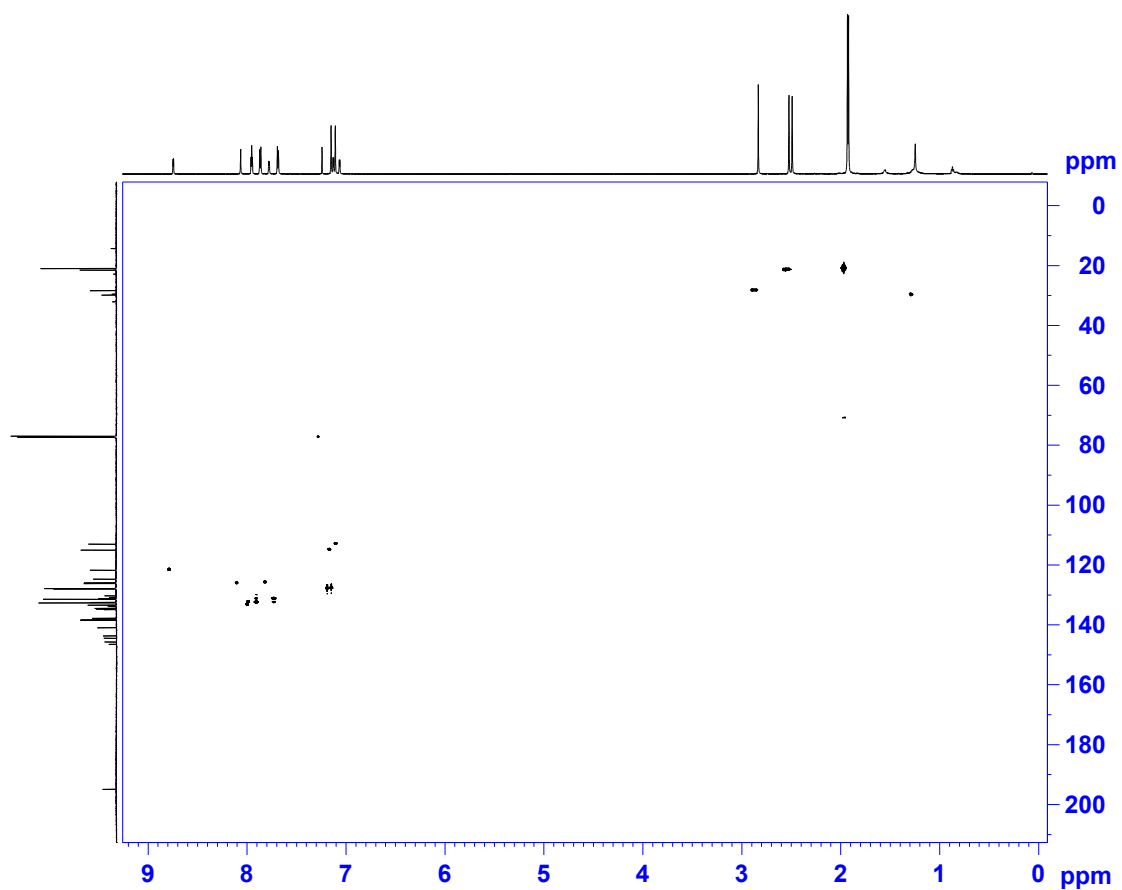

Figure S17.  $^1\text{H}$ ,  $^{13}\text{C}$  HSQC spectrum of 5a (700/175 MHz, 298 K,  $\text{CDCl}_3$ ).

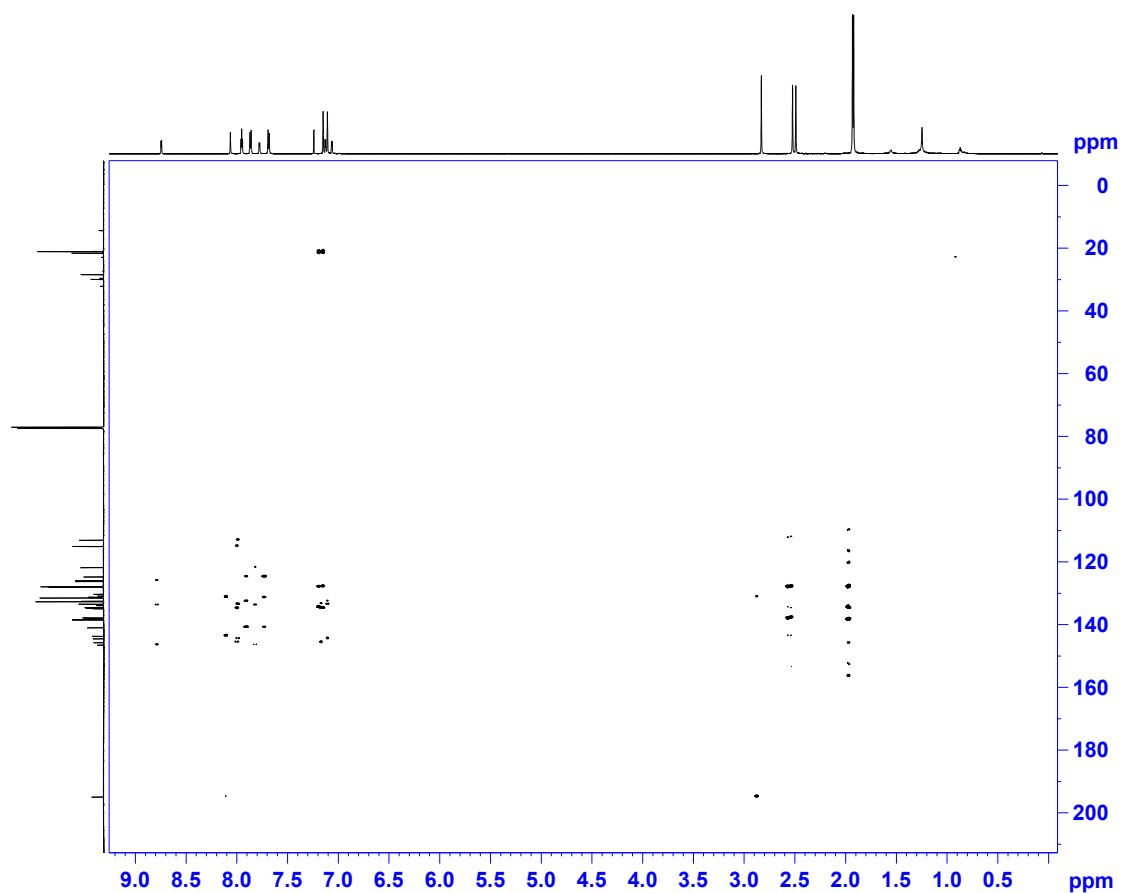

Figure S18.  $^1\text{H}$ ,  $^{13}\text{C}$  HMBC spectrum of **5a** (700/175 MHz, 298 K,  $\text{CDCl}_3$ ).

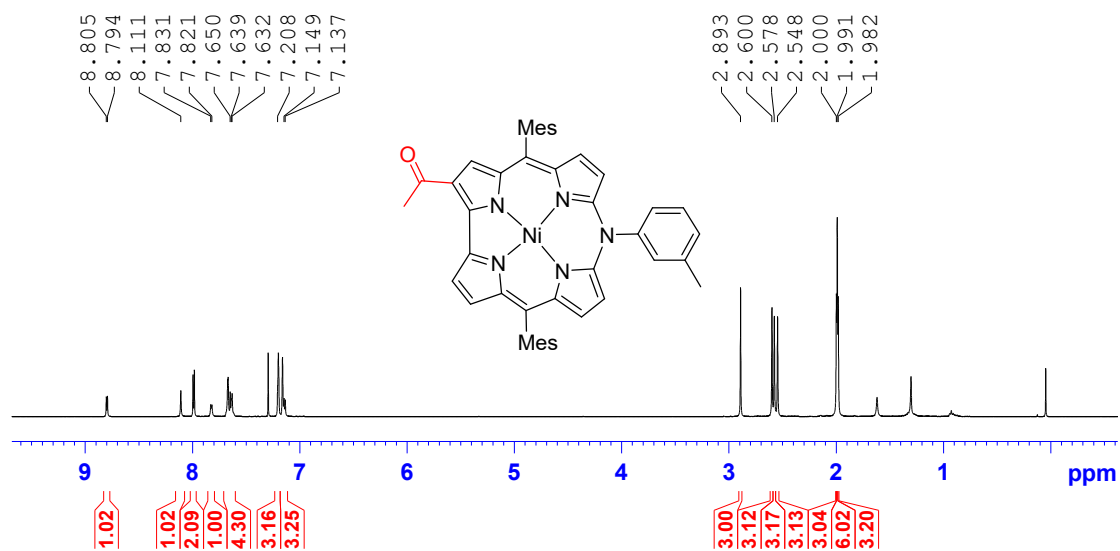

Figure S19.  $^1\text{H}$  NMR spectrum of **5b** (400 MHz, 298 K,  $\text{CDCl}_3$ ).

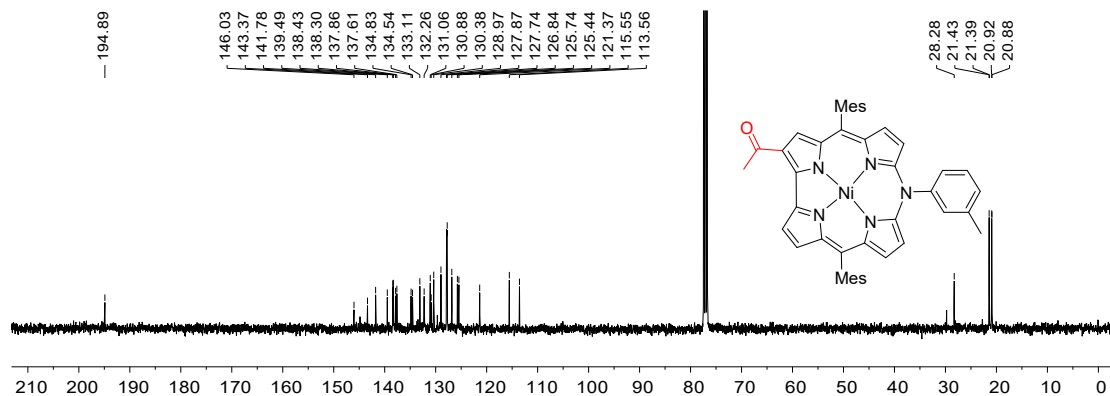

Figure S20. <sup>13</sup>C NMR spectrum of 5b (100 MHz, 298 K, CDCl<sub>3</sub>).

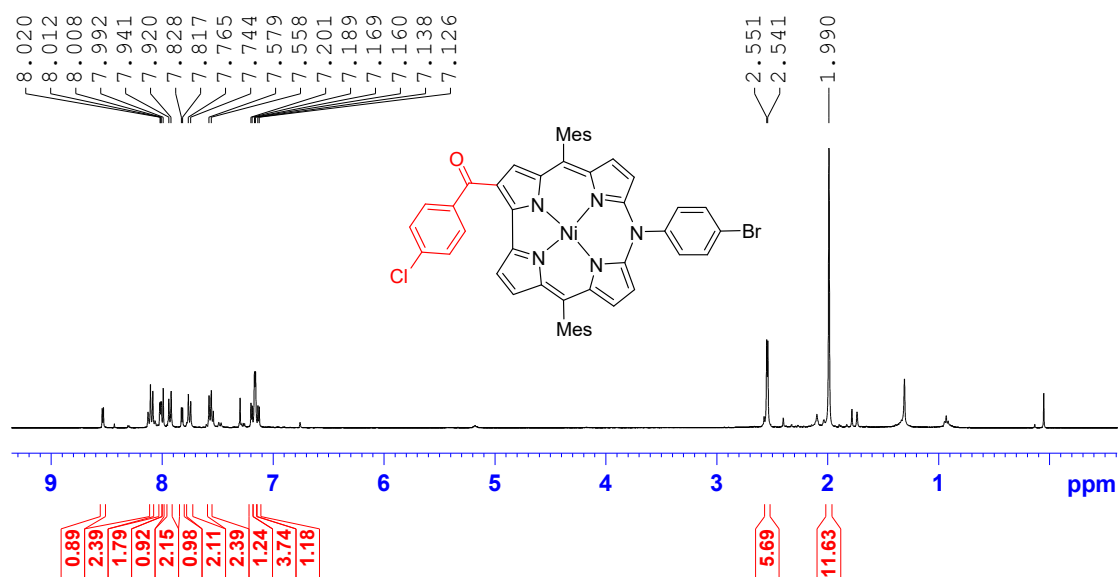

Figure S21. <sup>1</sup>H NMR spectrum of 5c (400 MHz, 298 K, CDCl<sub>3</sub>).

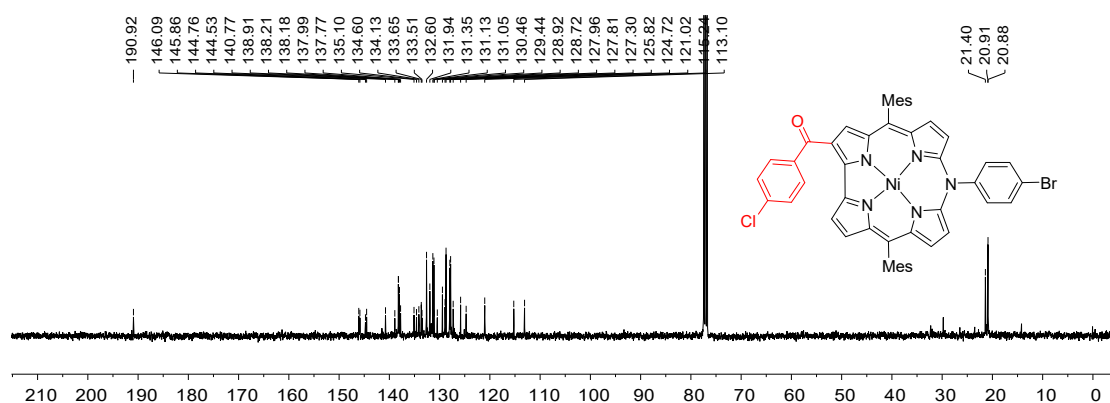

Figure S22. <sup>13</sup>C NMR spectrum of 5c (100 MHz, 298 K, CDCl<sub>3</sub>).

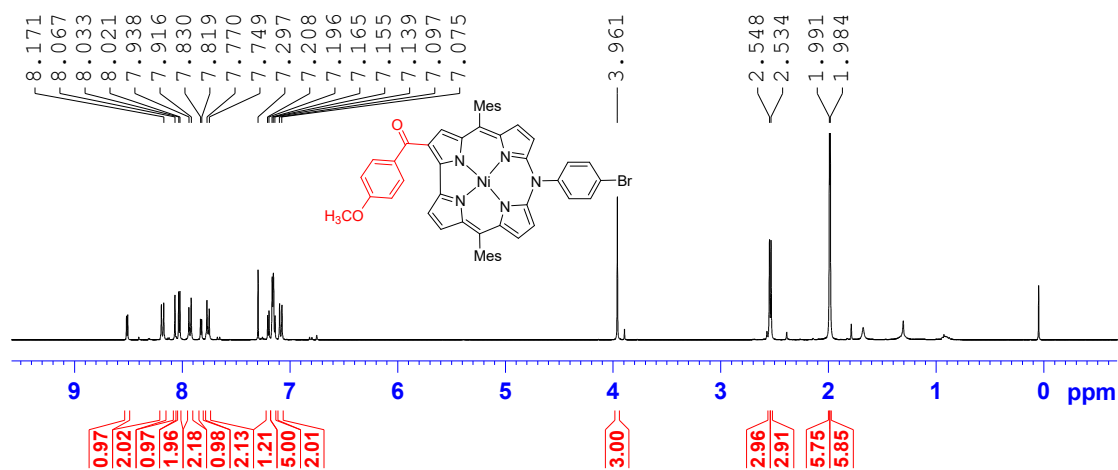

Figure S23. <sup>1</sup>H NMR spectrum of **5d** (400 MHz, 298 K, CDCl<sub>3</sub>).

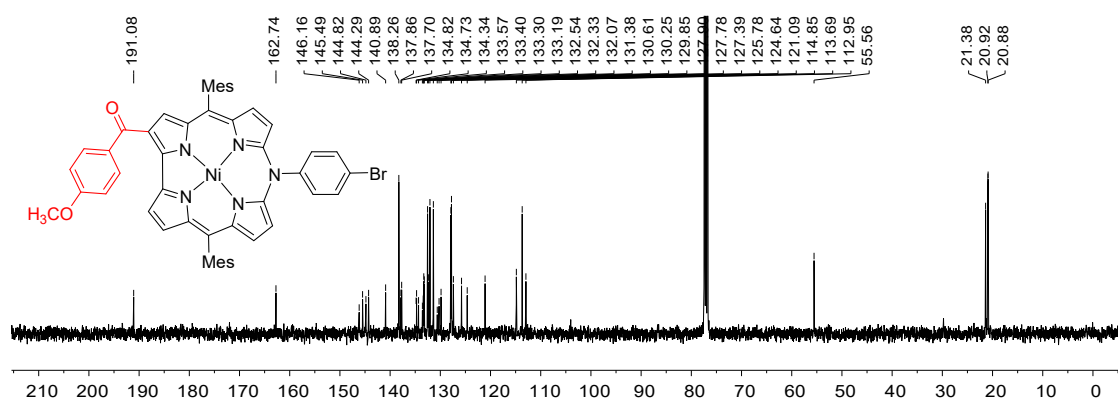

Figure S24. <sup>13</sup>C NMR spectrum of **5d** (100 MHz, 298 K, CDCl<sub>3</sub>).

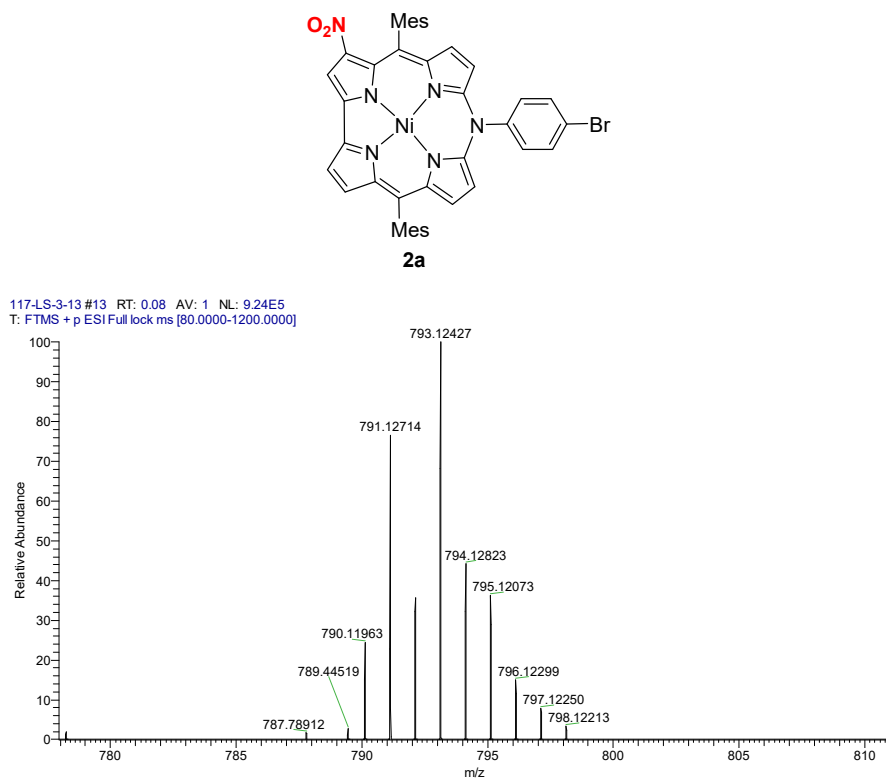

Figure S25. ESI(+) HRMS spectrum of **2a**.

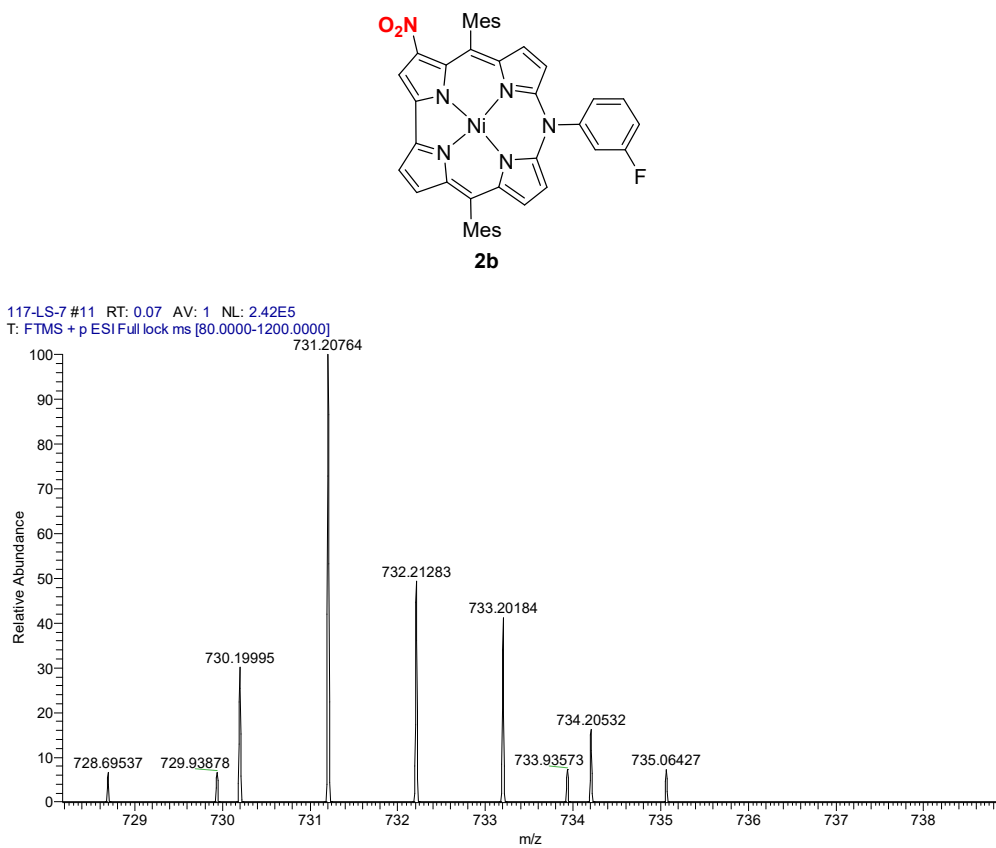

Figure S26. ESI(-) HRMS spectrum of **2b**.

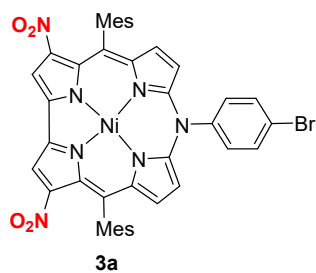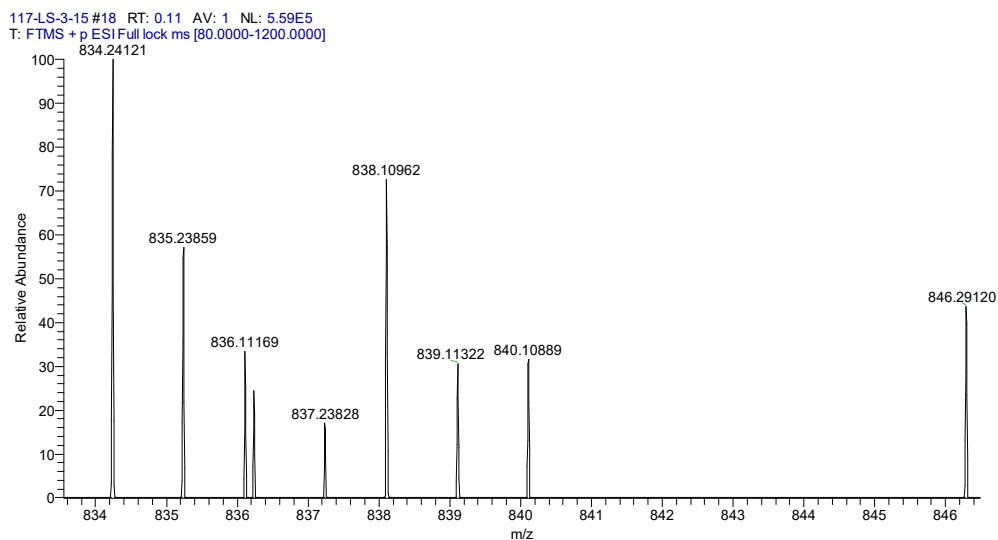

Figure S27. ESI(+)-HRMS spectrum of **3a**.

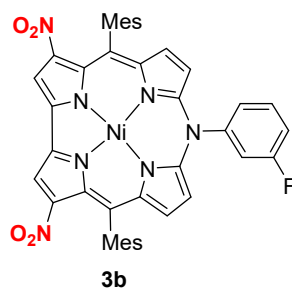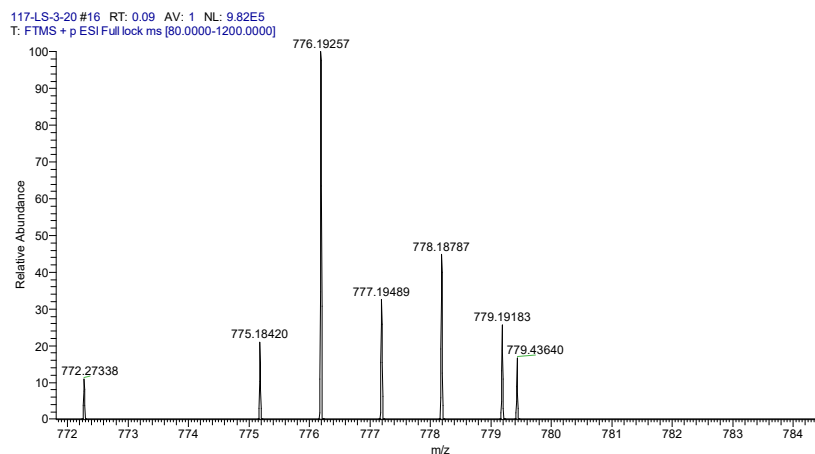

Figure S28. ESI(+)-HRMS spectrum of **3b**.

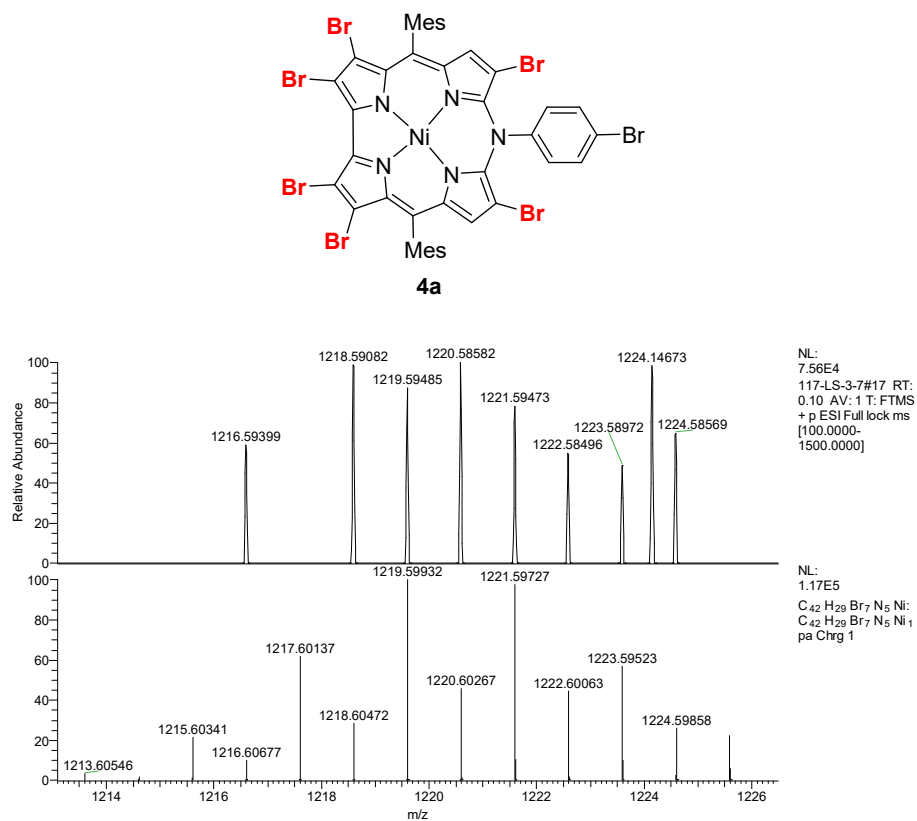

Figure S29. ESI(+)-HRMS spectrum of **4a**.

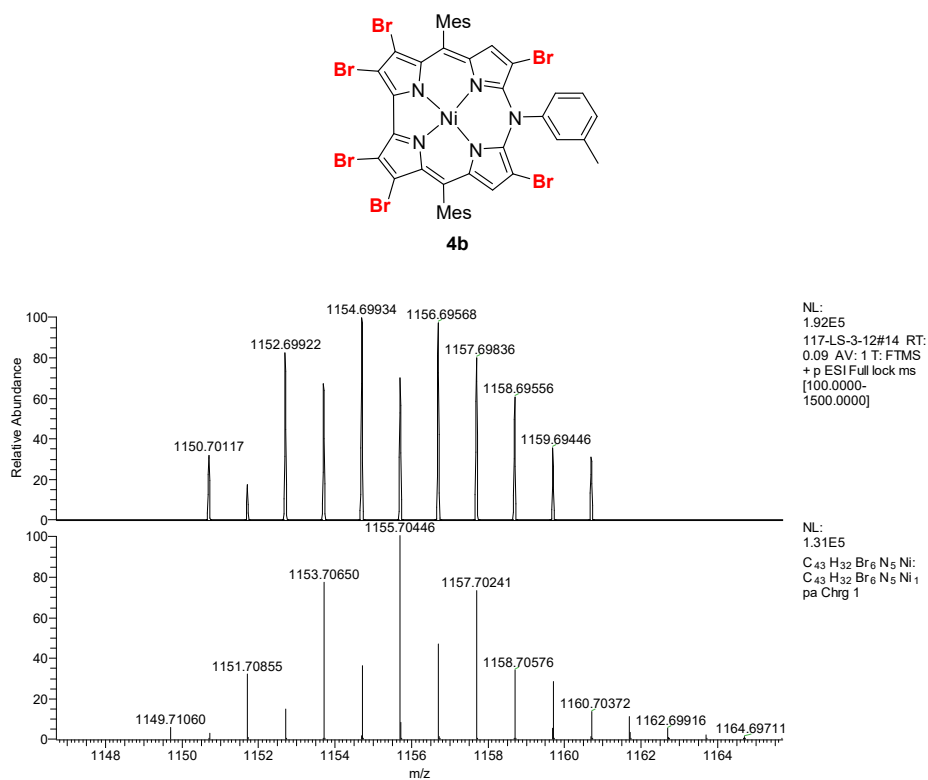

Figure S30. ESI(+)-HRMS spectrum of **4b**.



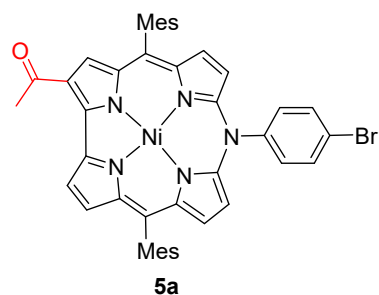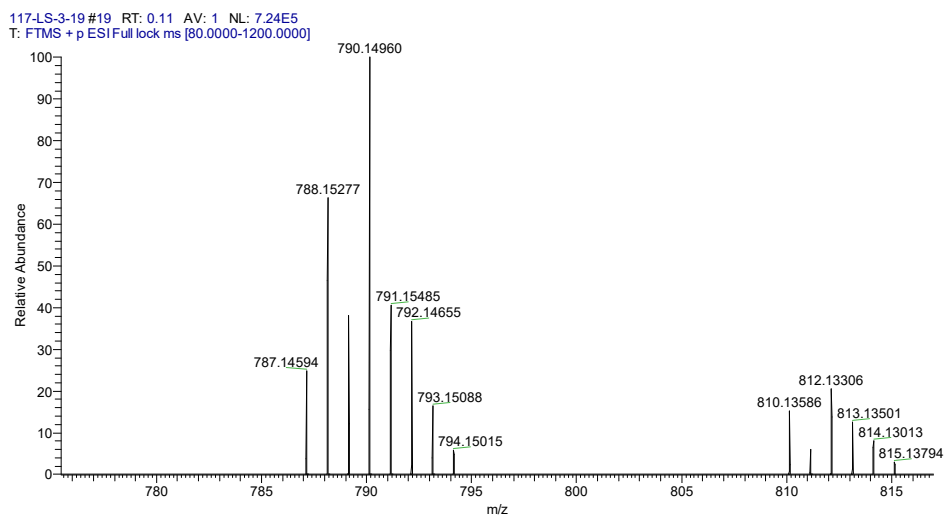

Figure S31. ESI(+)-HRMS spectrum of **5a**.

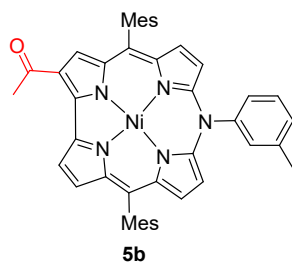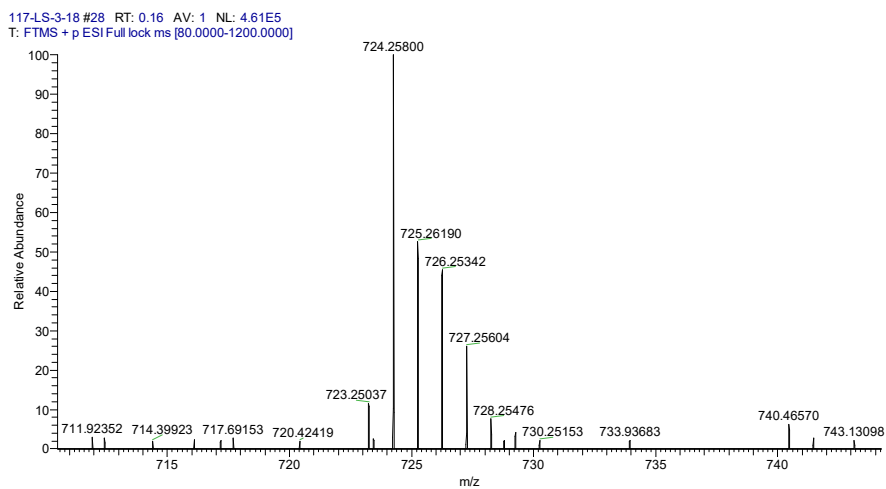

Figure S32. ESI(+)-HRMS spectrum of **5b**.

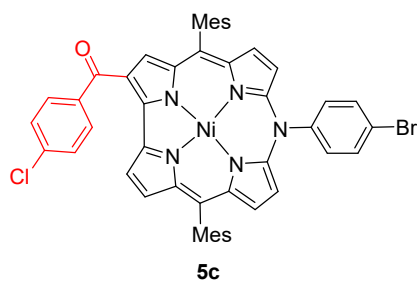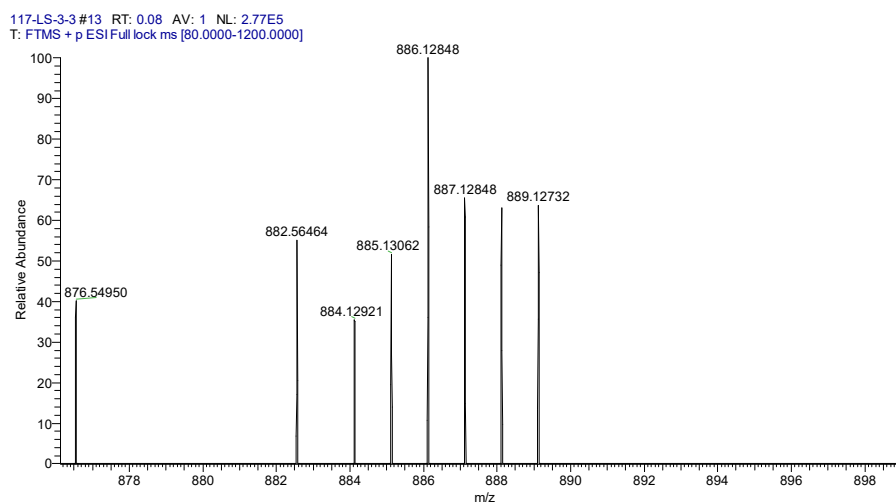

Figure S33. ESI(+)-HRMS spectrum of **5c**

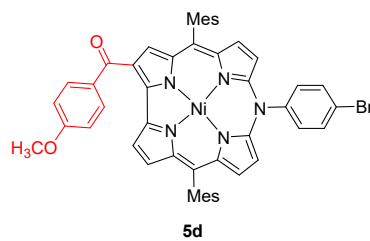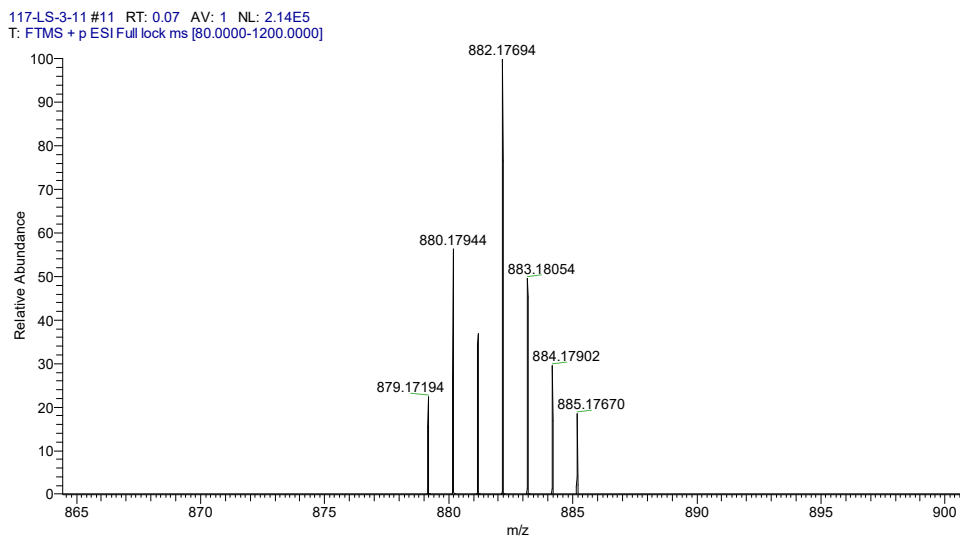

Figure S34. ESI(+)-HRMS spectrum of **5d**.

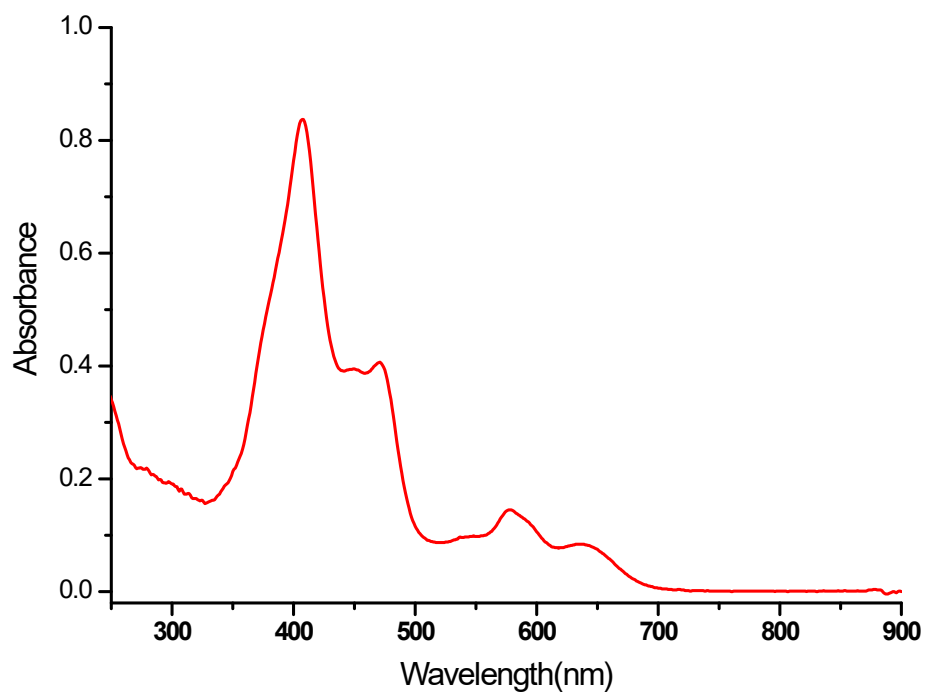

**Figure S35.** UV-vis spectrum of **2a** ( $\text{CH}_2\text{Cl}_2$ ).

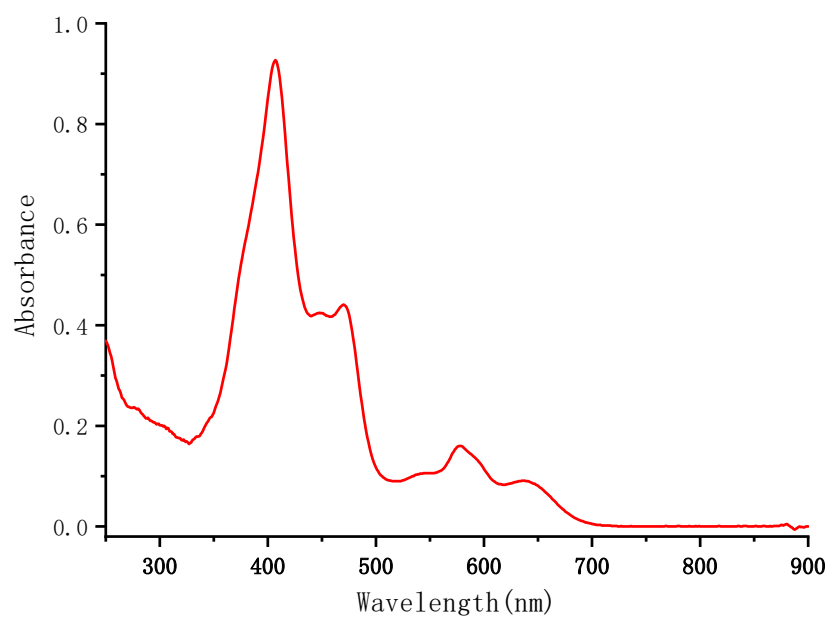

**Figure S36.** UV-vis spectrum of **2b** ( $\text{CH}_2\text{Cl}_2$ ).

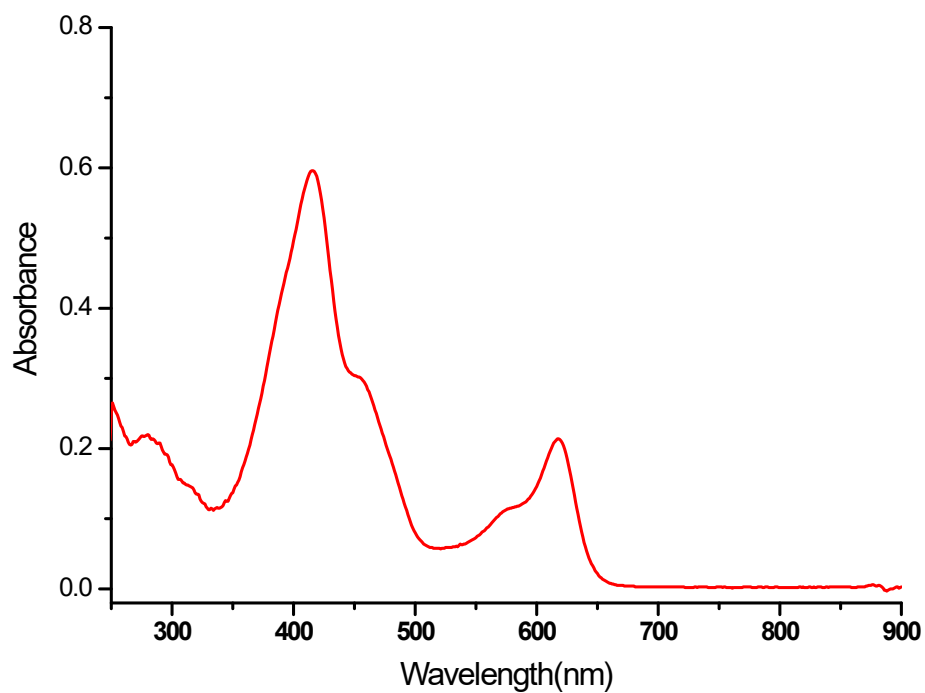

**Figure S37.** UV-vis spectrum of **3a** ( $\text{CH}_2\text{Cl}_2$ ).

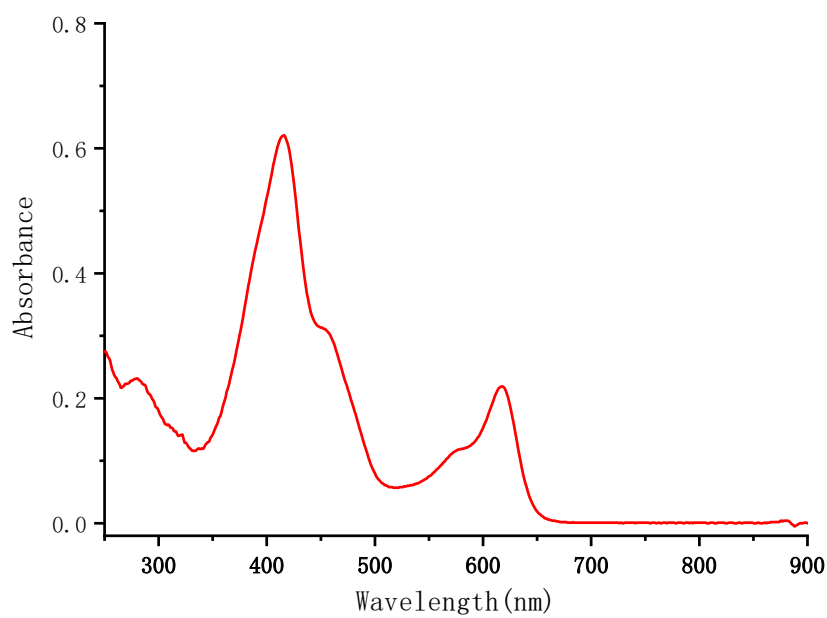

**Figure S38.** UV-vis spectrum of **3b** ( $\text{CH}_2\text{Cl}_2$ ).

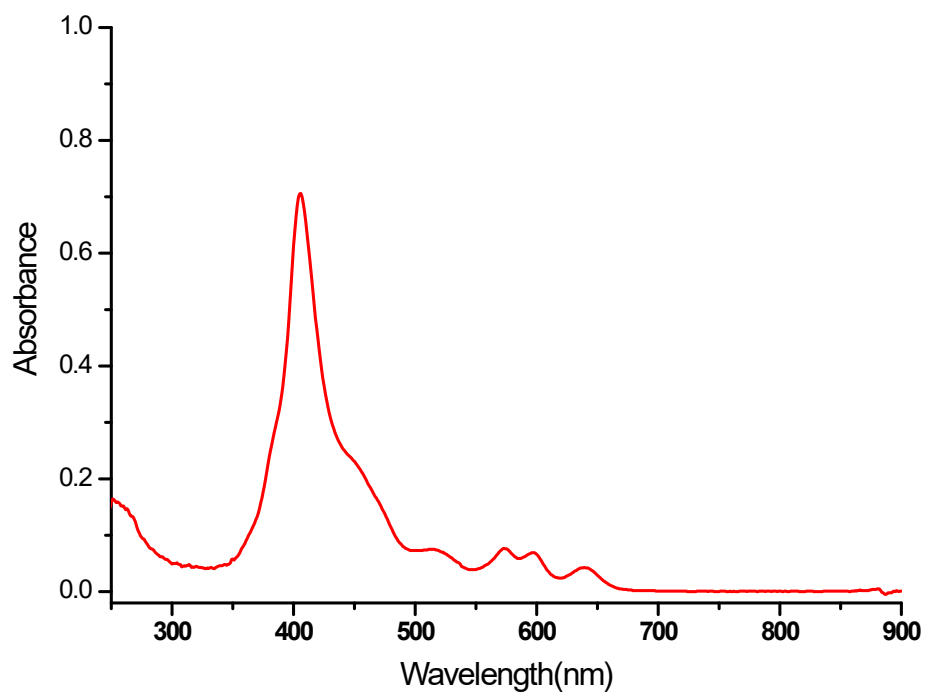

Figure S39. UV-vis spectrum of **4a** (CH<sub>2</sub>Cl<sub>2</sub>).

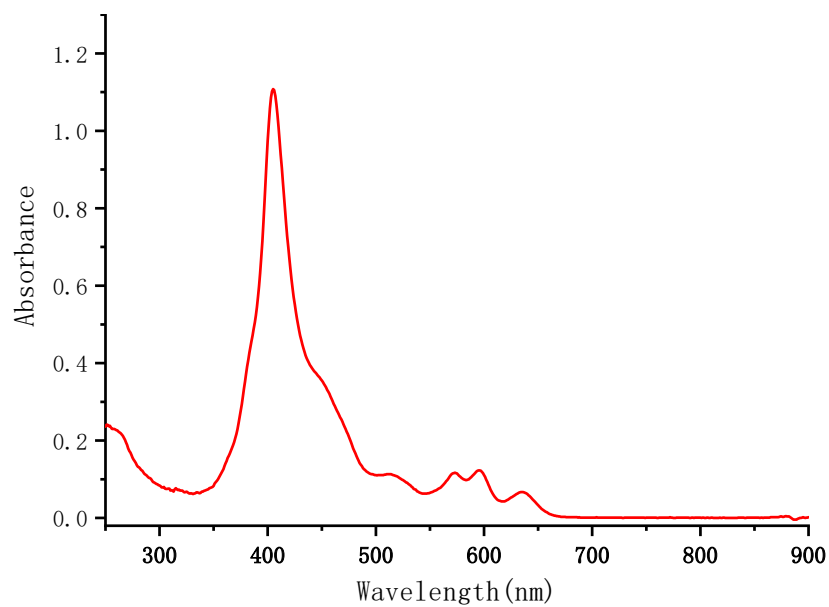

Figure S40. UV-vis spectrum of **4b** (CH<sub>2</sub>Cl<sub>2</sub>).

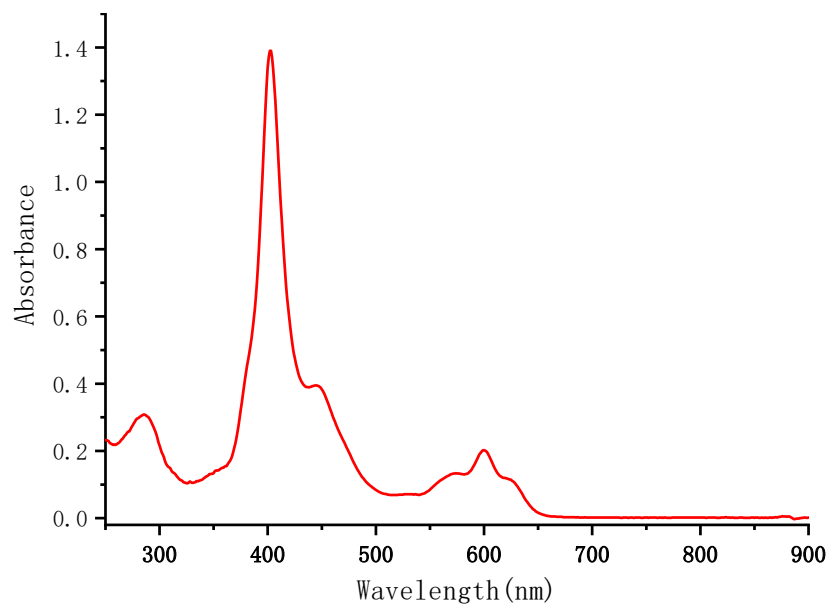

**Figure S41.** UV-vis spectrum of **5a** ( $\text{CH}_2\text{Cl}_2$ ).

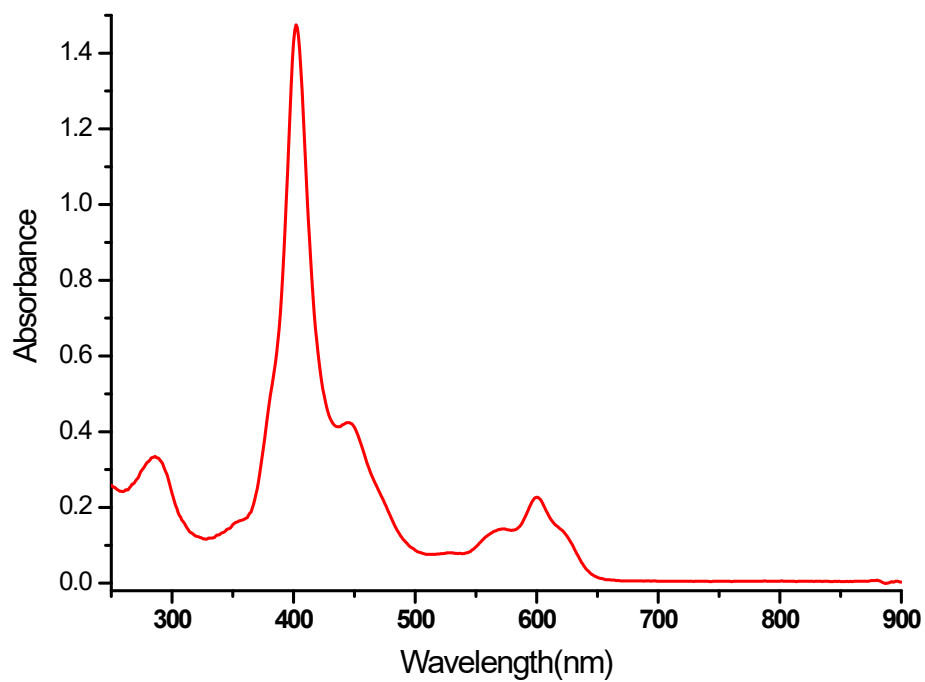

**Figure S42.** UV-vis spectrum of **5b** ( $\text{CH}_2\text{Cl}_2$ ).

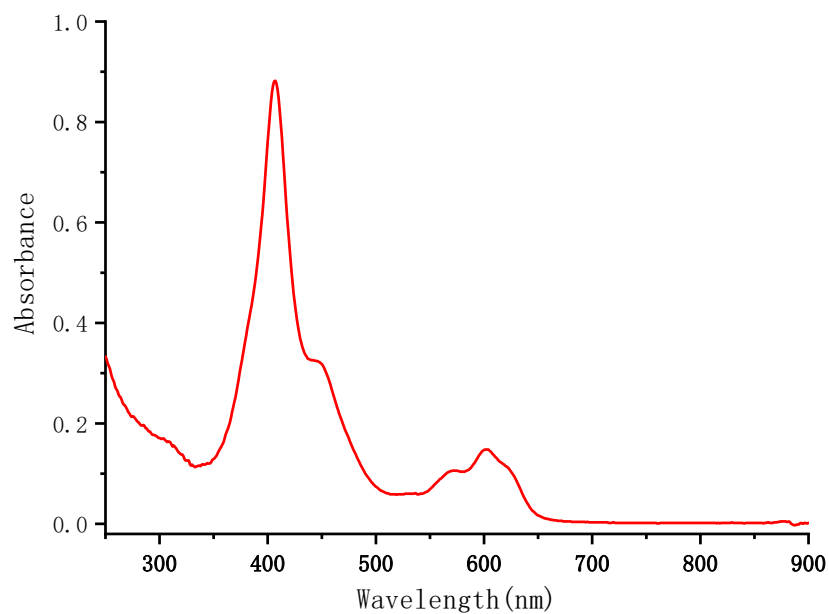

**Figure S43.** UV-vis spectrum of **5c** (CH<sub>2</sub>Cl<sub>2</sub>).

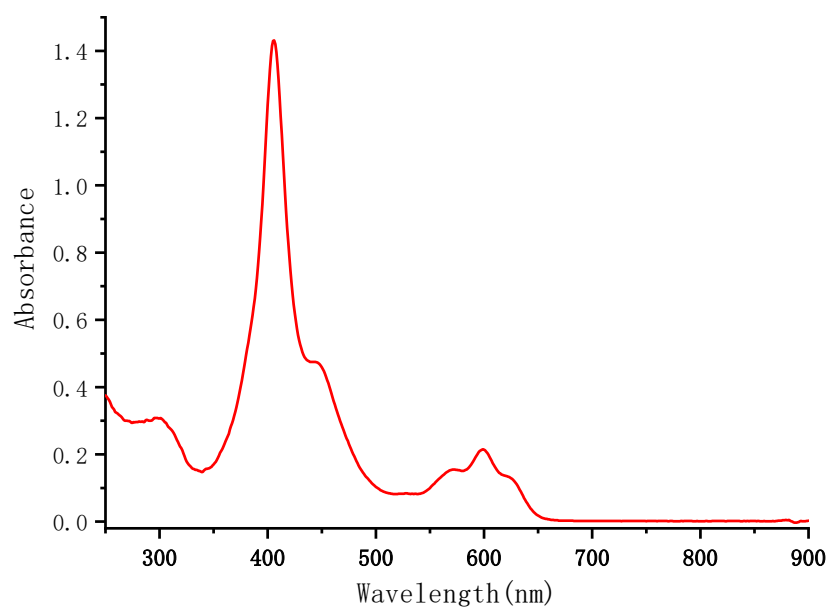

**Figure S44.** UV-vis spectrum of **5d** (CH<sub>2</sub>Cl<sub>2</sub>).





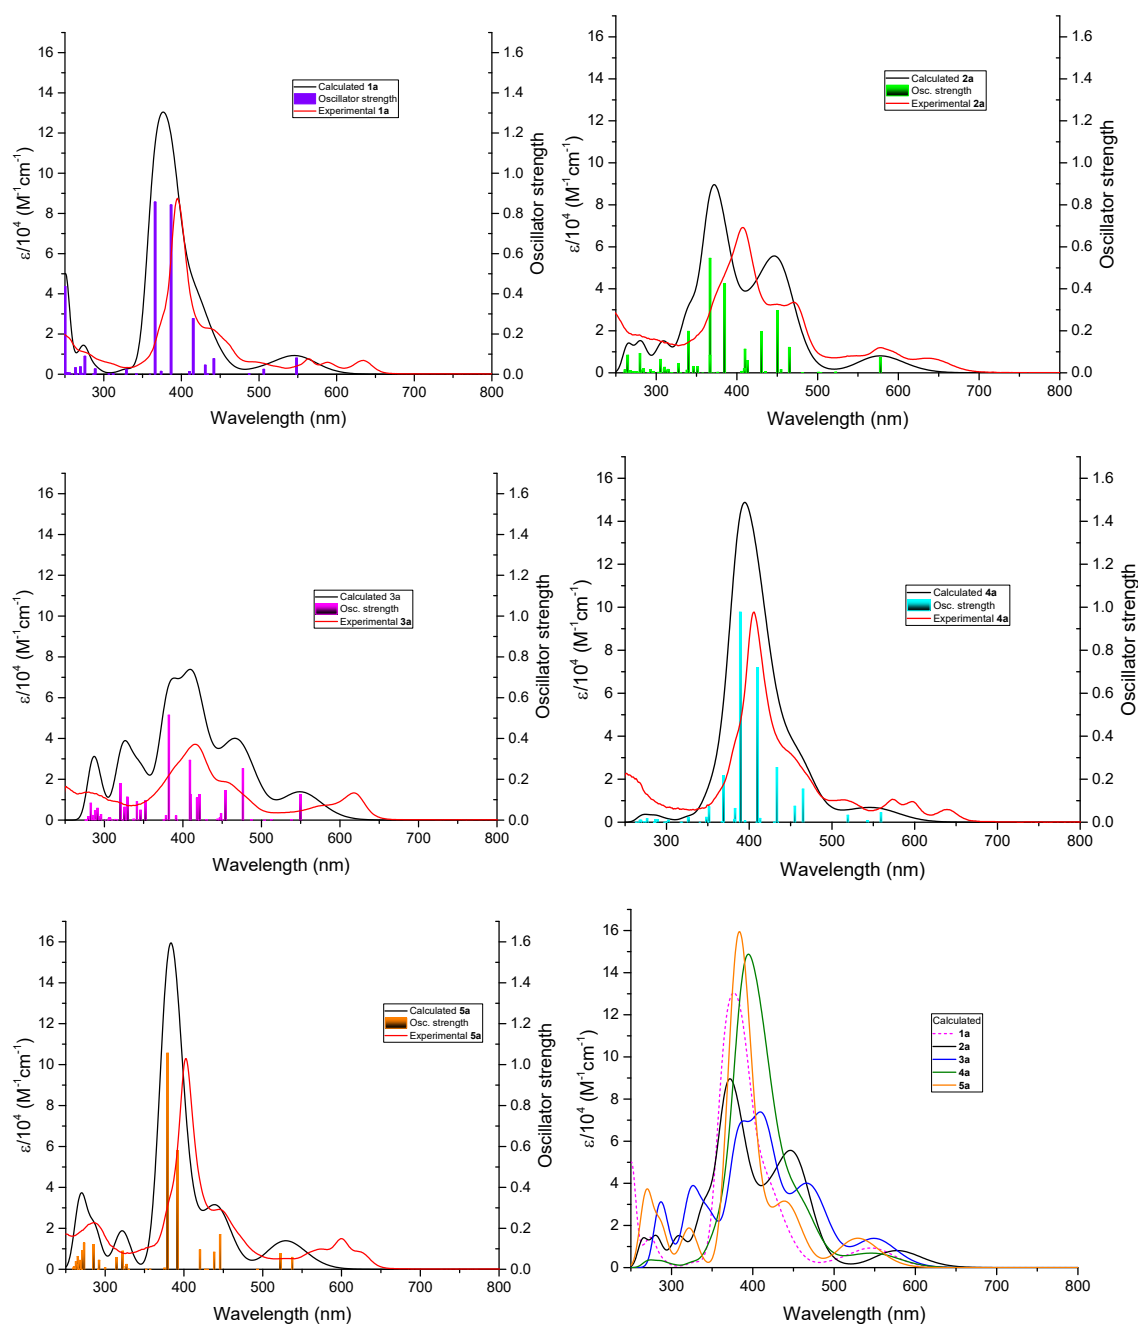

**Figure S47** Calculated (black traces) and experimental (red traces) UV-Vis spectra along with histograms representing oscillator strengths of the transitions obtained by TD DFT for DFT-optimized models of the substituted azacorrroles **1a-5a**.

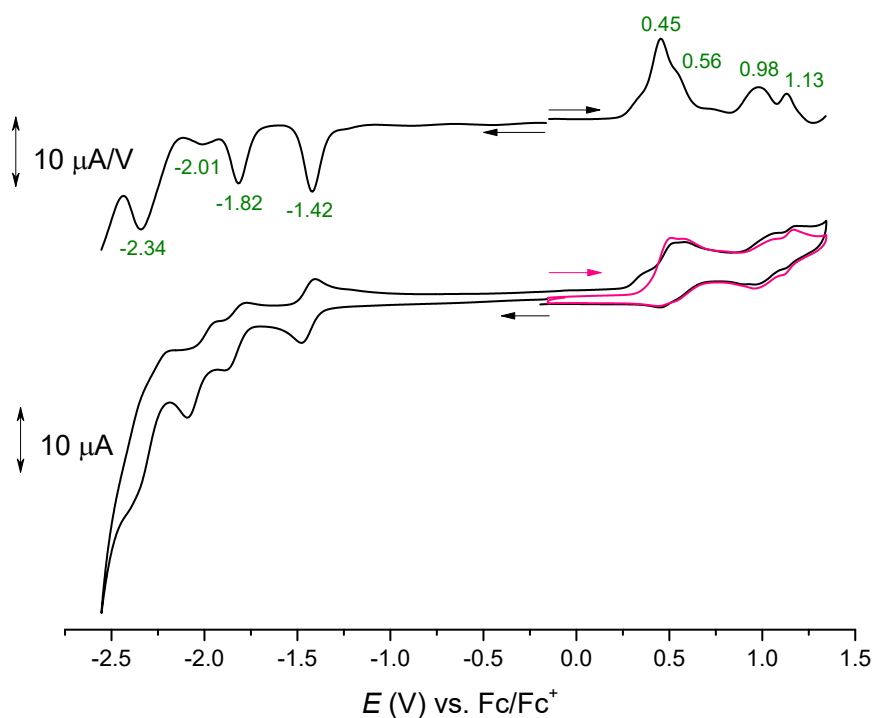

**Figure S48** Cyclic (lower traces) and differential pulse (upper traces) voltammograms for **2a** in dichloromethane solution. The green numbers are the electrode potentials in volts. The horizontal arrows indicate directions of the potential advances.

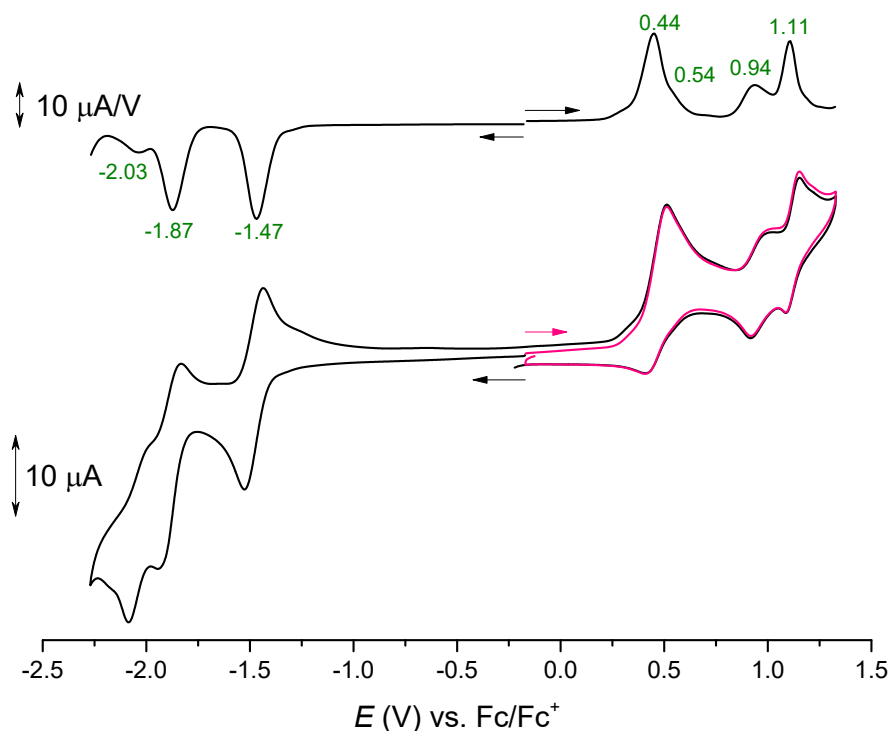

**Figure S49** Cyclic (lower traces) and differential pulse (upper traces) voltammograms for **2b** in dichloromethane solution. The green numbers are the electrode potentials in volts. The horizontal arrows indicate directions of the potential advances.

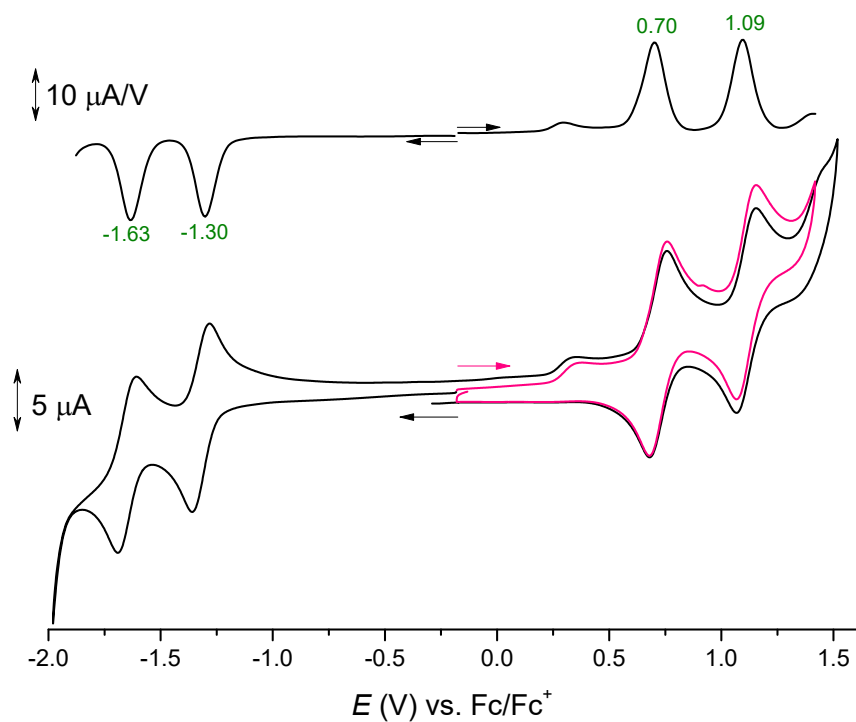

**Figure S50** Cyclic (lower traces) and differential pulse (upper traces) voltammograms for **3a** in dichloromethane solution. The green numbers are the electrode potentials in volts. The horizontal arrows indicate directions of the potential advances.

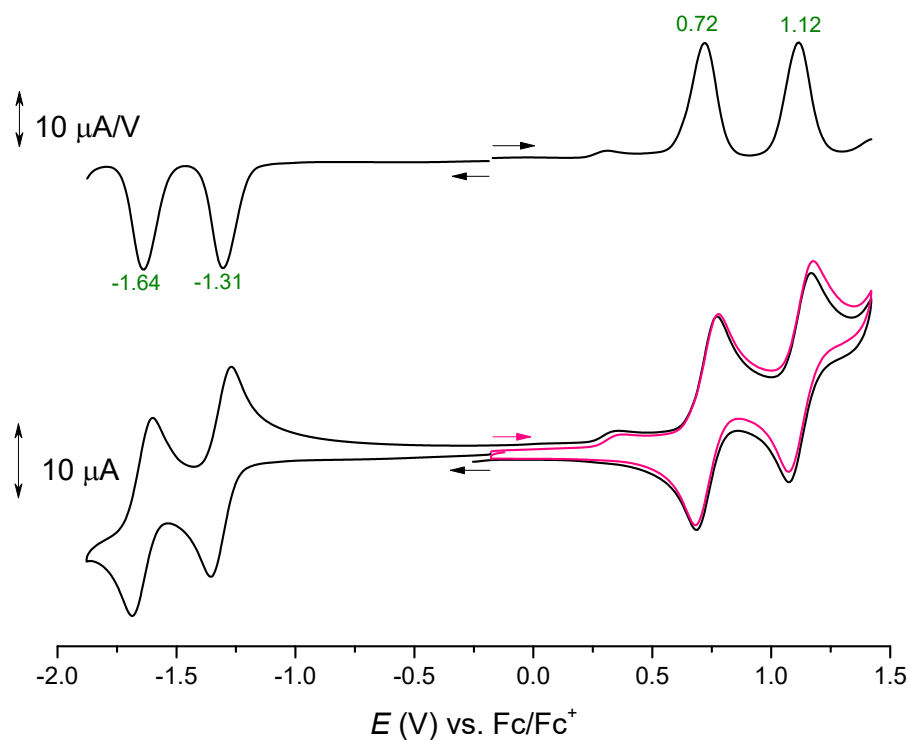

**Figure S51** Cyclic (lower traces) and differential pulse (upper traces) voltammograms for **3b** in dichloromethane solution. The green numbers are the electrode potentials in volts. The horizontal arrows indicate directions of the potential advances.

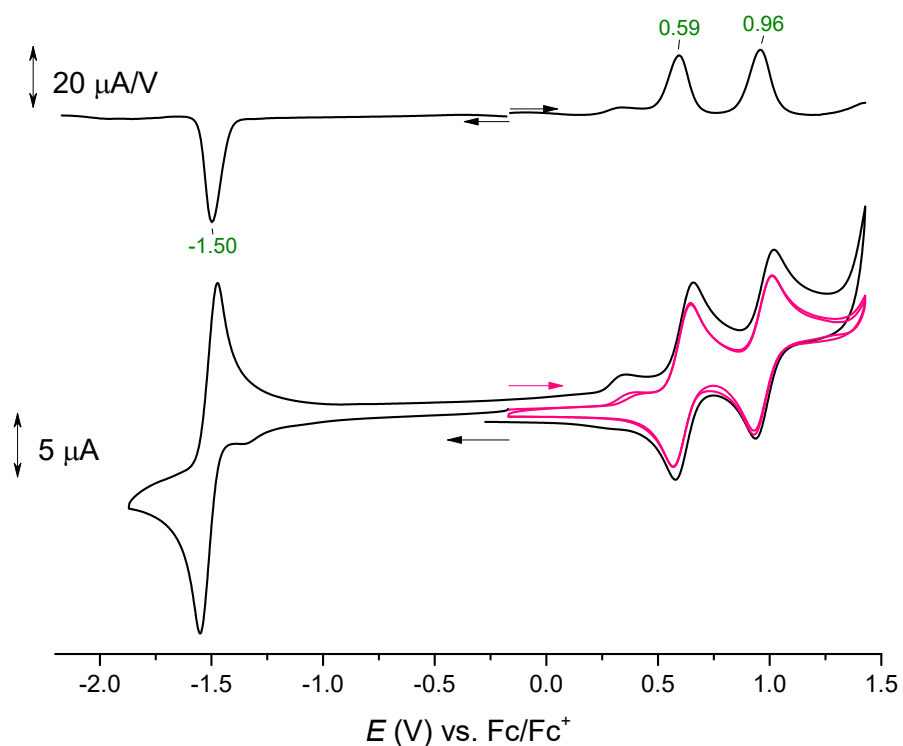

**Figure S52** Cyclic (lower traces) and differential pulse (upper traces) voltammograms for **4a** in dichloromethane solution. The green numbers are the electrode potentials in volts. The horizontal arrows indicate directions of the potential advances.

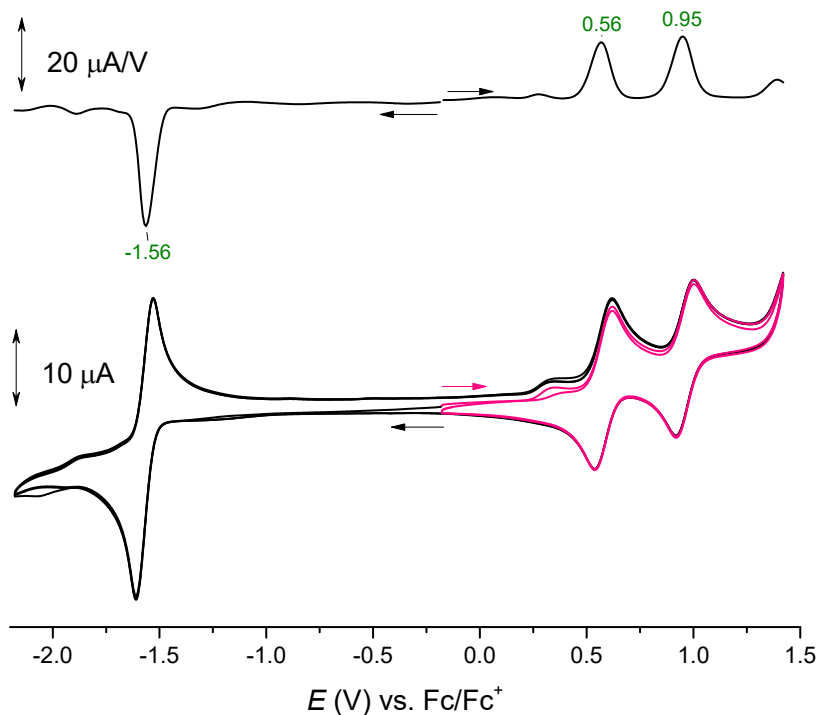

**Figure S53** Cyclic (lower traces) and differential pulse (upper traces) voltammograms for **4b** in dichloromethane solution. The green numbers are the electrode potentials in volts. The horizontal arrows indicate directions of the potential advances.

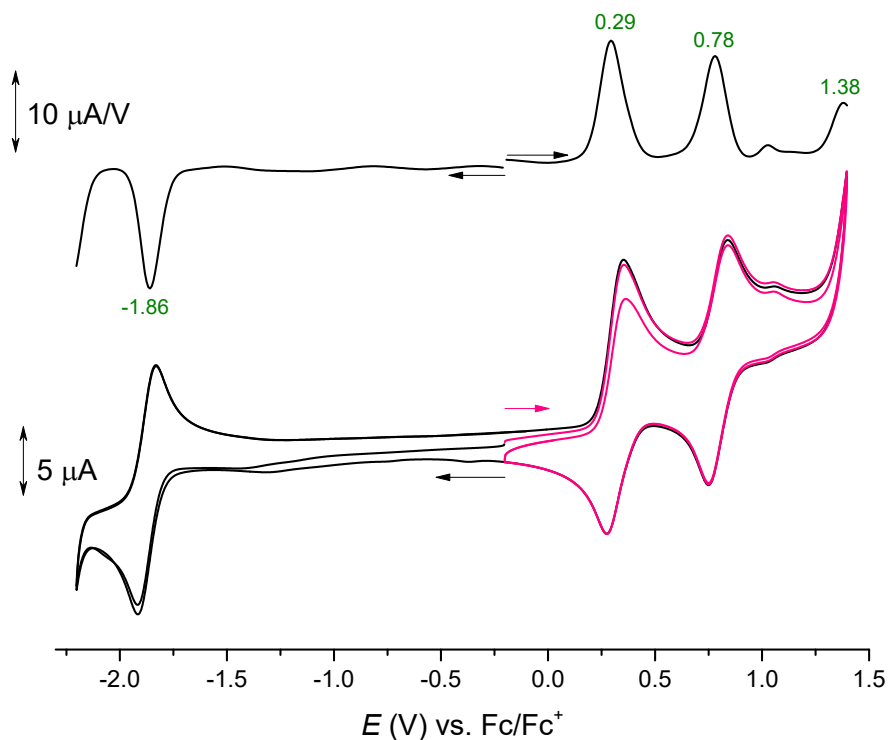

**Figure S54** Cyclic (lower traces) and differential pulse (upper traces) voltammograms for **5a** in dichloromethane solution. The green numbers are the electrode potentials in volts. The horizontal arrows indicate directions of the potential advances.

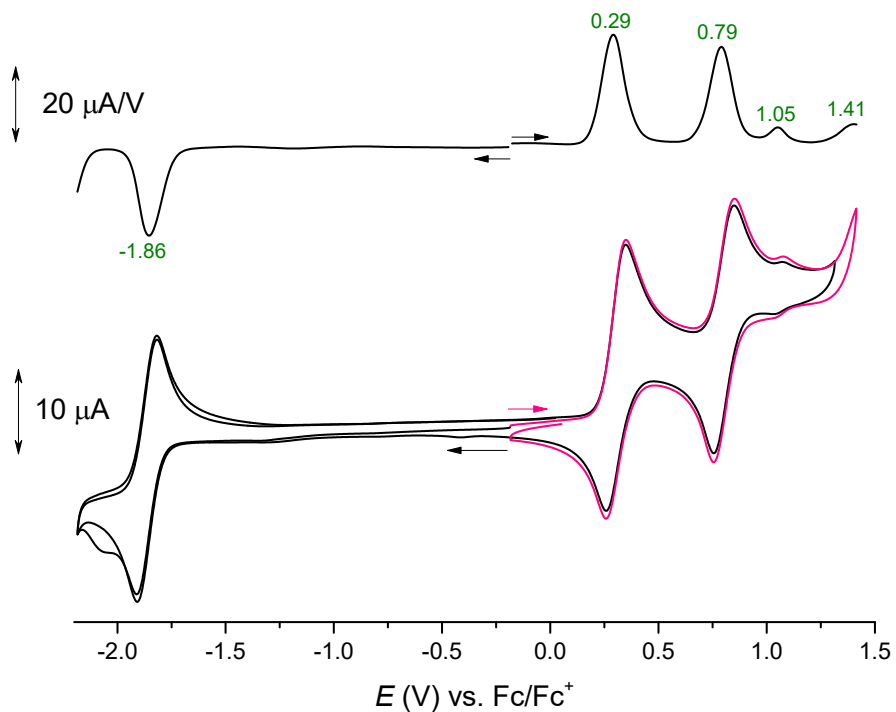

**Figure S55** Cyclic (lower traces) and differential pulse (upper traces) voltammograms for **5b** in dichloromethane solution. The green numbers are the electrode potentials in volts. The horizontal arrows indicate directions of the potential advances.

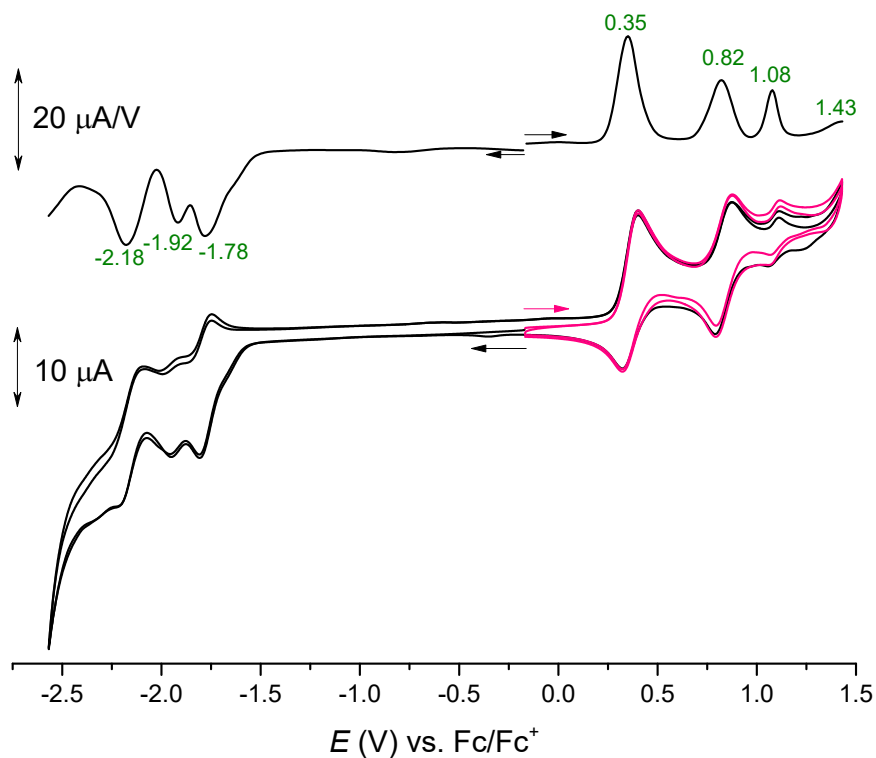

**Figure S56** Cyclic (lower traces) and differential pulse (upper traces) voltammograms for **5c** in dichloromethane solution. The green numbers are the electrode potentials in volts. The horizontal arrows indicate directions of the potential advances.

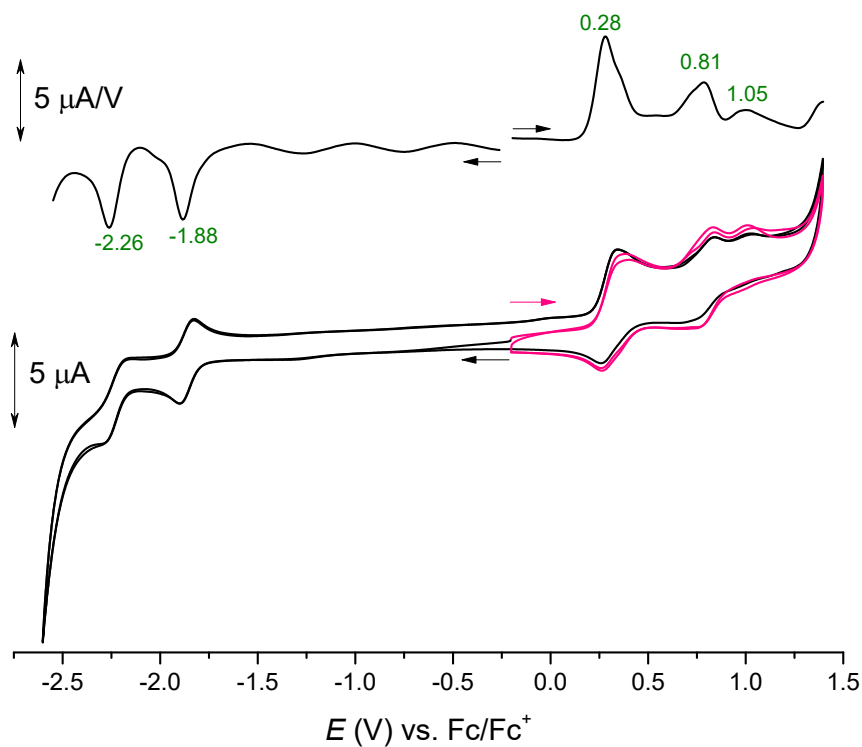

**Figure S57** Cyclic (lower traces) and differential pulse (upper traces) voltammograms for **5d** in dichloromethane solution. The green numbers are the electrode potentials in volts. The horizontal arrows indicate directions of the potential advances.

**Table S1.** Electrochemical data for the 10-azacorrole derivatives (DCM, electrode potentials in V vs. Fc/Fc<sup>+</sup>)

| Entry | Compd.                        | $E_{\text{Red3}}$    | $E_{\text{Red2}}$    | $E_{\text{Red1}}$ | $E_{\text{Ox1}}$ | $E_{\text{Ox2}}$ | $E_{\text{Ox3}}$    | $\Delta E$ |
|-------|-------------------------------|----------------------|----------------------|-------------------|------------------|------------------|---------------------|------------|
| 1     | <b>2a</b>                     | -2.01 <sup>[a]</sup> | -1.82                | -1.42             | 0.45             | 0.98             | 1.13                | 1.87       |
| 2     | <b>2b</b>                     | -2.03 <sup>[a]</sup> | -1.87                | -1.47             | 0.44             | 0.94             | 1.11                | 1.91       |
| 3     | <b>3a</b>                     | -                    | -1.63                | -1.30             | 0.70             | 1.09             | -                   | 2.00       |
| 4     | <b>3b</b>                     | -                    | -1.64                | -1.31             | 0.72             | 1.12             | -                   | 2.03       |
| 5     | <b>4a</b>                     | -                    | -                    | -1.50             | 0.59             | 0.96             | -                   | 2.09       |
| 6     | <b>4b</b>                     | -                    | -                    | -1.56             | 0.56             | 0.95             | -                   | 2.12       |
| 7     | <b>5a</b>                     | -                    | -                    | -1.86             | 0.29             | 0.78             | 1.38 <sup>[a]</sup> | 2.15       |
| 8     | <b>5b</b>                     | -                    | -                    | -1.86             | 0.29             | 0.79             | 1.41 <sup>[a]</sup> | 2.15       |
| 9     | <b>5c</b>                     | -2.18                | -1.92 <sup>[a]</sup> | -1.78             | 0.35             | 0.82             | 1.08 <sup>[a]</sup> | 2.13       |
| 10    | <b>5d</b>                     | -                    | -2.26                | -1.88             | 0.28             | 0.91             | 1.05 <sup>[a]</sup> | 2.16       |
| 11    | <b>1(3-Me)</b> <sup>[b]</sup> | -                    | -                    | -2.09             | 0.16             | 0.68             | -                   | 2.25       |
| 12    | <b>1(3-F)</b> <sup>[c]</sup>  | -                    | -                    | -2.07             | 0.10             | 0.69             | -                   | 2.17       |
| 13    | <b>1(4-Br)</b> <sup>[d]</sup> | -                    | -                    | -2.08             | 0.18             | 0.68             | -                   | 2.26       |

[a] Irreversible couple. [b] Data from *Chem. Commun.*, 2023, **59**, 3739 (ref. 45) for *N*-(3-methylphenyl)-10-azacorrole. [c] Data from *Chem. Commun.*, 2023, **59**, 3739 (ref. 45) for *N*-(3-fluorophenyl)-10-azacorrole. [d] Data from *Chem. Commun.*, 2023, **59**, 3739 (ref. 45) for *N*-(4-bromophenyl)-10-azacorrole.

**Table S2** Electronic transitions calculated for **1a**

| No. | Energy (cm <sup>-1</sup> ) | Wavelength (nm) | Osc. Strength | Major contribs                                                                                          |
|-----|----------------------------|-----------------|---------------|---------------------------------------------------------------------------------------------------------|
| 1   | 18235.4                    | 548.4           | 0.0801        | HOMO->LUMO (87%)                                                                                        |
| 2   | 19754.9                    | 506.2           | 0.0246        | H-1->LUMO (23%), HOMO->L+1 (72%)                                                                        |
| 3   | 19925.9                    | 501.9           | 0             | H-3->L+4 (51%), HOMO->L+4 (33%)                                                                         |
| 4   | 20520.4                    | 487.3           | 0.0019        | H-4->L+4 (91%)                                                                                          |
| 5   | 21090.6                    | 474.1           | 0             | H-15->L+4 (10%), H-2->L+4 (83%)                                                                         |
| 6   | 22632.7                    | 441.8           | 0.0768        | H-2->LUMO (66%), H-1->LUMO (25%)                                                                        |
| 7   | 23049.7                    | 433.8           | 0.0003        | H-4->LUMO (99%)                                                                                         |
| 8   | 23217.5                    | 430.7           | 0.0454        | H-3->LUMO (40%), H-1->L+1 (53%)<br>H-3->L+1 (29%), H-2->LUMO (29%), H-1->LUMO (29%),<br>HOMO->L+1 (13%) |
| 9   | 24084.5                    | 415.2           | 0.2764        | H-2->L+1 (90%)                                                                                          |
| 10  | 24365.2                    | 410.4           | 0.0136        | H-4->L+1 (99%)                                                                                          |
| 11  | 24757.2                    | 403.9           | 0             | H-3->LUMO (45%), H-1->L+1 (38%)                                                                         |
| 12  | 25863.8                    | 386.6           | 0.8422        | H-17->L+4 (94%)                                                                                         |
| 13  | 26746.2                    | 373.9           | 0.0146        | H-3->L+1 (62%), H-1->LUMO (22%), HOMO->L+1 (14%)                                                        |
| 14  | 27311.5                    | 366.1           | 0.8567        | H-6->L+1 (26%), H-5->LUMO (73%)                                                                         |
| 15  | 27818.1                    | 359.5           | 0.0001        | H-6->LUMO (72%), H-5->L+1 (27%)                                                                         |
| 16  | 27836.6                    | 359.2           | 0             | HOMO->L+2 (99%)                                                                                         |
| 17  | 28875.5                    | 346.3           | 0             | H-8->LUMO (44%), H-7->LUMO (33%), H-7->L+1 (21%)                                                        |
| 18  | 29245.7                    | 341.9           | 0.0003        | H-8->LUMO (33%), H-8->L+1 (20%), H-7->LUMO (44%)                                                        |
| 19  | 29247.3                    | 341.9           | 0.0007        | H-3->L+4 (29%), HOMO->L+4 (66%)                                                                         |
| 20  | 30232.9                    | 330.8           | 0             | H-9->LUMO (98%)                                                                                         |
| 21  | 30381.3                    | 329.1           | 0.0225        | HOMO->L+3 (99%)                                                                                         |
| 22  | 30475.7                    | 328.1           | 0.0002        | H-1->L+2 (92%)                                                                                          |
| 23  | 30962.8                    | 323.0           | 0             | H-6->LUMO (27%), H-5->L+1 (73%)                                                                         |
| 24  | 31005.6                    | 322.5           | 0             | H-6->L+1 (74%), H-5->LUMO (26%)                                                                         |
| 25  | 31031.4                    | 322.3           | 0             | H-1->L+4 (92%)                                                                                          |
| 26  | 31266.1                    | 319.8           | 0             | H-8->L+1 (49%), H-7->LUMO (19%), H-7->L+1 (26%)                                                         |
| 27  | 31960.5                    | 312.9           | 0             | H-8->LUMO (20%), H-8->L+1 (27%), H-7->L+1 (51%)                                                         |
| 28  | 31964.6                    | 312.8           | 0.0002        | H-9->L+1 (94%)                                                                                          |
| 29  | 32067.8                    | 311.8           | 0.0026        | H-1->L+3 (99%)                                                                                          |
| 30  | 32613.0                    | 306.6           | 0.0022        | H-10->LUMO (99%)                                                                                        |
| 31  | 33888.2                    | 295.1           | 0             | H-11->LUMO (97%)                                                                                        |
| 32  | 34610.1                    | 288.9           | 0.0264        | HOMO->L+5 (97%)                                                                                         |
| 33  | 34829.4                    | 287.1           | 0.0003        | HOMO->L+6 (97%)                                                                                         |
| 34  | 34859.3                    | 286.9           | 0.0001        | H-2->L+2 (99%)                                                                                          |
| 35  | 35433.5                    | 282.2           | 0             | H-3->L+2 (98%)                                                                                          |
| 36  | 35744.9                    | 279.8           | 0             | H-11->L+1 (85%)                                                                                         |
| 37  | 36269.9                    | 275.7           | 0.0897        | H-10->L+1 (96%)                                                                                         |
| 38  | 36293.3                    | 275.5           | 0.0008        | H-17->LUMO (97%)                                                                                        |
| 39  | 36507.1                    | 273.9           | 0             |                                                                                                         |



|    |         |       |        |                                                                           |
|----|---------|-------|--------|---------------------------------------------------------------------------|
| 40 | 36747.4 | 272.1 | 0      | H-4->L+2 (100%)                                                           |
| 41 | 36814.4 | 271.6 | 0.0044 | HOMO->L+8 (91%)                                                           |
| 42 | 36844.2 | 271.4 | 0.0017 | H-2->L+3 (94%)                                                            |
| 43 | 36846.6 | 271.4 | 0.0001 | HOMO->L+9 (93%)                                                           |
| 44 | 37053.1 | 269.9 | 0.0366 | H-13->LUMO (25%), H-12->LUMO (51%)                                        |
| 45 | 37199.9 | 268.8 | 0      | H-3->L+3 (98%)                                                            |
| 46 | 37636.2 | 265.7 | 0.0003 | H-15->LUMO (58%), H-14->LUMO (36%)                                        |
| 47 | 37779.0 | 264.7 | 0      | HOMO->L+7 (99%)                                                           |
| 48 | 37790.3 | 264.6 | 0.0001 | H-1->L+5 (96%)                                                            |
| 49 | 37816.9 | 264.4 | 0      | H-1->L+6 (96%)                                                            |
| 50 | 37950.0 | 263.5 | 0.032  | H-16->LUMO (25%), H-13->LUMO (25%), H-12->LUMO (34%),<br>HOMO->L+10 (10%) |
| 51 | 38146.8 | 262.1 | 0      | H-4->L+3 (100%)                                                           |
| 52 | 38313.8 | 261.0 | 0      | H-17->L+1 (99%)                                                           |
| 53 | 38569.4 | 259.3 | 0.0001 | H-15->LUMO (14%), H-14->LUMO (32%), H-12->L+1 (49%)                       |
| 54 | 39091.3 | 255.8 | 0.0066 | H-16->LUMO (55%), H-13->LUMO (19%), HOMO->L+10 (23%)                      |
| 55 | 39358.2 | 254.1 | 0.0023 | H-16->L+1 (15%), H-15->LUMO (11%), H-13->L+1 (59%)                        |
| 56 | 39519.6 | 253.0 | 0.0083 | H-15->L+1 (41%), H-14->L+1 (50%)                                          |
| 57 | 39813.9 | 251.2 | 0.0017 | H-1->L+8 (95%)                                                            |
| 58 | 39824.4 | 251.1 | 0.0075 | H-1->L+9 (93%)                                                            |
| 59 | 39980.1 | 250.1 | 0.4369 | H-15->L+1 (13%), H-13->LUMO (15%), HOMO->L+10 (50%)                       |
| 60 | 40381.8 | 247.6 | 0.0001 | H-1->L+7 (99%)                                                            |

**Table S3** Electronic transitions calculated for **2a**

| No. | Energy (cm <sup>-1</sup> ) | Wavelength (nm) | Osc. Strength | Major contribs                                                    |
|-----|----------------------------|-----------------|---------------|-------------------------------------------------------------------|
| 1   | 17311.1                    | 577.7           | 0.0738        | HOMO->LUMO (92%)                                                  |
| 2   | 19140.3                    | 522.5           | 0.0038        | H-1->LUMO (36%), HOMO->L+1 (60%)                                  |
| 3   | 19841.2                    | 504.0           | 0.0008        | H-3->L+4 (19%), H-2->L+4 (18%), HOMO->L+4 (19%)                   |
| 4   | 19952.5                    | 501.2           | 0.0027        | H-5->L+4 (56%), H-5->L+5 (24%)                                    |
| 5   | 20772.8                    | 481.4           | 0.0005        | H-3->L+4 (23%), H-3->L+5 (10%), H-2->L+4 (29%), H-2->L+5 (13%)    |
| 6   | 21510.8                    | 464.9           | 0.1214        | H-2->LUMO (58%), H-1->LUMO (13%), HOMO->L+1 (10%)                 |
| 7   | 21990.7                    | 454.7           | 0.0148        | H-5->LUMO (79%)                                                   |
| 8   | 22203.6                    | 450.4           | 0.2951        | H-2->LUMO (20%), H-1->LUMO (28%), H-1->L+1 (14%), HOMO->L+1 (10%) |
| 9   | 22965.8                    | 435.4           | 0.0049        | H-4->LUMO (81%)                                                   |
| 10  | 23219.9                    | 430.7           | 0.1959        | H-3->LUMO (45%), H-1->L+1 (15%)                                   |
| 11  | 24224.9                    | 412.8           | 0.0568        | H-3->LUMO (21%), H-3->L+1 (11%), H-2->L+1 (43%), H-1->L+1 (13%)   |
| 12  | 24388.6                    | 410.0           | 0.1124        | H-2->L+1 (31%), H-1->L+1 (19%), HOMO->L+2 (24%)                   |
| 13  | 24445.1                    | 409.1           | 0.0198        | H-5->L+1 (86%)                                                    |
| 14  | 24648.3                    | 405.7           | 0.0067        | H-6->LUMO (97%)                                                   |
| 15  | 25980.7                    | 384.9           | 0.4233        | H-3->L+1 (57%), H-2->L+1 (16%)                                    |
| 16  | 26568.7                    | 376.4           | 0.0028        | H-17->L+4 (60%), H-17->L+5 (26%)                                  |
| 17  | 26942.1                    | 371.2           | 0.0002        | H-7->LUMO (25%), H-7->L+1 (73%)                                   |
| 18  | 27266.4                    | 366.8           | 0.5457        | H-7->LUMO (10%), H-1->L+1 (15%), HOMO->L+2 (48%)                  |
| 19  | 27274.4                    | 366.6           | 0.0838        | H-7->LUMO (64%), H-7->L+1 (22%)                                   |

|    |         |       |        |                                                                        |
|----|---------|-------|--------|------------------------------------------------------------------------|
| 20 | 27962.4 | 357.6 | 0.0002 | H-8->LUMO (95%)                                                        |
| 21 | 28427.8 | 351.8 | 0.0011 | H-8->L+1 (88%)                                                         |
| 22 | 28456.9 | 351.4 | 0.0296 | H-4->L+1 (84%)                                                         |
| 23 | 28901.3 | 346.0 | 0.0305 | H-9->LUMO (83%)                                                        |
| 24 | 29402.1 | 340.1 | 0.1978 | H-1->L+2 (73%)                                                         |
| 25 | 29578.0 | 338.1 | 0.0124 | H-3->L+4 (10%), HOMO->L+4 (45%), HOMO->L+5 (19%)                       |
| 26 | 29711.0 | 336.6 | 0.0002 | H-6->L+1 (99%)                                                         |
| 27 | 30326.4 | 329.7 | 0.0006 | HOMO->L+3 (96%)                                                        |
| 28 | 30538.6 | 327.5 | 0.0423 | H-13->LUMO (10%), H-11->LUMO (24%), H-4->L+2 (11%)                     |
| 29 | 31299.2 | 319.5 | 0.0016 | H-1->L+4 (64%), H-1->L+5 (27%)                                         |
| 30 | 31390.3 | 318.6 | 0.0002 | H-10->LUMO (96%)                                                       |
| 31 | 31754.9 | 314.9 | 0.0162 | H-9->L+1 (93%)                                                         |
| 32 | 31971.0 | 312.8 | 0.0135 | H-2->L+2 (10%), HOMO->L+4 (27%), HOMO->L+5 (59%)                       |
| 33 | 32222.7 | 310.3 | 0.0264 | H-4->L+2 (19%), H-3->L+2 (27%), H-2->L+2 (42%)                         |
| 34 | 32276.7 | 309.8 | 0.0188 | H-4->L+2 (36%), H-3->L+2 (12%), H-2->L+2 (32%)                         |
| 35 | 32730.0 | 305.5 | 0.0639 | H-11->LUMO (24%), H-4->L+2 (20%), H-3->L+2 (39%)                       |
| 36 | 32796.9 | 304.9 | 0.0016 | H-1->L+3 (95%)                                                         |
| 37 | 33060.7 | 302.5 | 0.0025 | H-5->L+2 (97%)                                                         |
| 38 | 33737.4 | 296.4 | 0.0048 | H-6->L+2 (95%)                                                         |
| 39 | 34149.5 | 292.8 | 0.0051 | H-10->L+1 (72%)                                                        |
| 40 | 34151.9 | 292.8 | 0.0141 | H-13->LUMO (13%), H-12->LUMO (13%), H-11->LUMO (28%), H-10->L+1 (25%)  |
| 41 | 34489.1 | 289.9 | 0.0011 | H-1->L+4 (29%), H-1->L+5 (68%)                                         |
| 42 | 35187.6 | 284.2 | 0.0194 | H-21->LUMO (15%), H-20->LUMO (14%), H-17->LUMO (12%), H-12->LUMO (16%) |
| 43 | 35330.3 | 283.0 | 0.0133 | H-16->LUMO (15%), H-12->LUMO (23%), H-11->L+1 (30%)                    |
| 44 | 35727.1 | 279.9 | 0.0913 | H-13->LUMO (12%), H-12->LUMO (15%), H-11->L+1 (48%)                    |
| 45 | 35893.3 | 278.6 | 0.0029 | H-17->LUMO (66%)                                                       |
| 46 | 36198.2 | 276.3 | 0.0001 | HOMO->L+6 (98%)                                                        |
| 47 | 36259.5 | 275.8 | 0.006  | H-15->LUMO (61%), H-12->LUMO (12%)                                     |
| 48 | 36724.8 | 272.3 | 0.0003 | H-7->L+2 (94%)                                                         |
| 49 | 36733.7 | 272.2 | 0      | H-2->L+3 (98%)                                                         |
| 50 | 36743.4 | 272.2 | 0.0057 | H-16->LUMO (10%), H-14->LUMO (62%)                                     |
| 51 | 37306.4 | 268.1 | 0.0001 | H-3->L+3 (98%)                                                         |
| 52 | 37323.3 | 267.9 | 0.0093 | H-19->LUMO (14%), H-14->LUMO (10%), H-13->LUMO (35%), H-13->L+1 (11%)  |
| 53 | 37486.2 | 266.8 | 0.0001 | H-8->L+2 (99%)                                                         |
| 54 | 37493.5 | 266.7 | 0.0049 | HOMO->L+7 (94%)                                                        |
| 55 | 37781.4 | 264.7 | 0.0844 | H-16->LUMO (33%), H-15->LUMO (13%), H-12->L+1 (19%)                    |
| 56 | 38075.8 | 262.6 | 0.0041 | H-17->L+1 (43%), H-12->L+1 (15%)                                       |
| 57 | 38212.9 | 261.7 | 0      | H-5->L+3 (97%)                                                         |
| 58 | 38223.4 | 261.6 | 0.0051 | H-17->L+1 (19%), H-12->L+1 (26%), HOMO->L+9 (31%)                      |
| 59 | 38264.6 | 261.3 | 0.0032 | H-2->L+4 (12%), H-2->L+5 (29%), HOMO->L+9 (41%)                        |
| 60 | 38277.5 | 261.3 | 0.0138 | H-17->L+1 (19%), H-2->L+4 (15%), H-2->L+5 (32%), HOMO->L+9 (12%)       |

**Table S4** Electronic transitions calculated for **3a**

| No. | Energy (cm <sup>-1</sup> ) | Wavelength (nm) | Osc. Strength | Major contribs                                                   |
|-----|----------------------------|-----------------|---------------|------------------------------------------------------------------|
| 1   | 18187.8                    | 549.8           | 0.1248        | H-1->L+1 (10%), HOMO->LUMO (86%)                                 |
| 2   | 18578.2                    | 538.3           | 0.0015        | H-1->LUMO (13%), HOMO->L+1 (80%)                                 |
| 3   | 19512.2                    | 512.5           | 0.0013        | H-8->L+4 (77%)                                                   |
| 4   | 19834.8                    | 504.2           | 0.0004        | H-5->L+4 (49%), HOMO->L+4 (23%)                                  |
| 5   | 20522.8                    | 487.3           | 0.0013        | H-4->L+4 (67%)                                                   |
| 6   | 20991.4                    | 476.4           | 0.2517        | H-1->LUMO (71%), HOMO->L+1 (10%)                                 |
| 7   | 22008.5                    | 454.4           | 0.1437        | H-5->LUMO (19%), H-4->L+1 (11%), H-2->LUMO (19%), H-1->L+1 (37%) |
| 8   | 22251.2                    | 449.4           | 0.0009        | H-8->LUMO (57%), H-4->LUMO (17%), H-3->LUMO (14%)                |
| 9   | 22294.0                    | 448.6           | 0.0318        | H-5->LUMO (10%), H-3->L+1 (22%), H-2->LUMO (50%), H-1->L+1 (13%) |
| 10  | 22361.7                    | 447.2           | 0.0114        | H-8->LUMO (24%), H-3->LUMO (46%), H-2->L+1 (19%)                 |
| 11  | 22506.9                    | 444.3           | 0.0053        | H-8->LUMO (12%), H-4->LUMO (63%)                                 |
| 12  | 23242.5                    | 430.2           | 0.0015        | H-8->L+1 (96%)                                                   |
| 13  | 23747.4                    | 421.1           | 0.1254        | H-7->LUMO (33%), H-6->L+1 (10%), H-4->L+1 (34%)                  |
| 14  | 23836.9                    | 419.5           | 0.001         | H-7->L+1 (25%), H-6->LUMO (68%)                                  |
| 15  | 23926.4                    | 417.9           | 0.1088        | H-7->LUMO (27%), H-6->L+1 (17%), H-4->L+1 (33%)                  |
| 16  | 24416.8                    | 409.6           | 0.1253        | H-5->L+1 (56%), HOMO->L+2 (17%)                                  |
| 17  | 24456.3                    | 408.9           | 0.2932        | H-5->LUMO (53%), H-1->L+1 (17%)                                  |
| 18  | 25483.9                    | 392.4           | 0.0003        | H-3->LUMO (30%), H-2->L+1 (60%)                                  |
| 19  | 25559.7                    | 391.2           | 0.0207        | H-3->L+1 (64%), H-2->LUMO (27%)                                  |
| 20  | 26171.9                    | 382.1           | 0.5148        | H-5->L+1 (14%), HOMO->L+2 (72%)                                  |
| 21  | 26418.7                    | 378.5           | 0.0216        | H-18->L+4 (71%)                                                  |
| 22  | 26609.8                    | 375.8           | 0.0008        | H-7->L+1 (24%), H-6->LUMO (19%), H-6->L+1 (45%)                  |
| 23  | 26613.1                    | 375.8           | 0.0008        | H-7->LUMO (18%), H-7->L+1 (44%), H-6->L+1 (25%)                  |
| 24  | 28380.2                    | 352.4           | 0.096         | H-1->L+2 (21%), HOMO->L+3 (68%)                                  |
| 25  | 28904.5                    | 346.0           | 0.0491        | H-10->LUMO (33%), H-1->L+2 (56%)                                 |
| 26  | 29290.0                    | 341.4           | 0.0911        | H-10->LUMO (43%), H-1->L+2 (14%)                                 |
| 27  | 29645.7                    | 337.3           | 0.0052        | H-5->L+4 (17%), HOMO->L+4 (70%)                                  |
| 28  | 29679.6                    | 336.9           | 0.001         | H-11->LUMO (13%), H-10->L+1 (47%)                                |
| 29  | 30374.0                    | 329.2           | 0.113         | H-10->L+1 (14%), H-1->L+3 (34%), H-1->L+4 (31%)                  |
| 30  | 30621.6                    | 326.6           | 0             | H-10->L+1 (26%), H-2->L+2 (10%), H-1->L+4 (41%)                  |
| 31  | 30636.2                    | 326.4           | 0.0006        | H-9->LUMO (99%)                                                  |
| 32  | 30688.6                    | 325.9           | 0.0635        | H-11->L+1 (10%), H-10->LUMO (15%), H-3->L+2 (26%)                |
| 33  | 30909.6                    | 323.5           | 0.0001        | H-9->L+1 (99%)                                                   |
| 34  | 31178.2                    | 320.7           | 0.1776        | H-1->L+3 (41%), H-1->L+4 (21%)                                   |
| 35  | 31699.2                    | 315.5           | 0.0009        | H-11->LUMO (15%), H-3->L+3 (11%), H-2->L+2 (46%), H-1->L+3 (12%) |
| 36  | 31844.4                    | 314.0           | 0.0034        | H-4->L+2 (27%), H-3->L+2 (31%), H-2->L+3 (18%)                   |
| 37  | 32266.2                    | 309.9           | 0.0001        | HOMO->L+5 (97%)                                                  |
| 38  | 32542.9                    | 307.3           | 0.0097        | H-11->LUMO (17%), H-5->L+2 (70%)                                 |
| 39  | 32597.7                    | 306.8           | 0.0121        | H-6->L+2 (22%), H-4->L+2 (42%)                                   |
| 40  | 32716.3                    | 305.7           | 0.0067        | H-7->L+2 (73%), H-6->L+3 (20%)                                   |
| 41  | 32801.0                    | 304.9           | 0.0002        | H-7->L+3 (12%), H-6->L+2 (50%), H-4->L+2 (11%)                   |

|    |         |       |        |                                                                                                                          |
|----|---------|-------|--------|--------------------------------------------------------------------------------------------------------------------------|
| 42 | 33235.7 | 300.9 | 0.0002 | H-8->L+2 (98%)                                                                                                           |
| 43 | 33820.4 | 295.7 | 0.0268 | H-11->LUMO (10%), H-5->L+2 (11%), H-4->L+3 (60%)                                                                         |
| 44 | 33894.6 | 295.0 | 0.0001 | H-1->L+5 (96%)                                                                                                           |
| 45 | 33962.4 | 294.4 | 0.0168 | HOMO->L+6 (90%)                                                                                                          |
| 46 | 34328.6 | 291.3 | 0.0584 | H-11->L+1 (17%), H-5->L+3 (54%)                                                                                          |
| 47 | 34701.2 | 288.2 | 0.0246 | H-12->LUMO (28%), H-11->L+1 (32%), H-5->L+3 (12%)<br>H-14->LUMO (28%), H-12->L+1 (14%), H-11->LUMO (17%), H-4->L+3 (14%) |
| 48 | 34706.8 | 288.1 | 0.0471 |                                                                                                                          |
| 49 | 34784.3 | 287.5 | 0.0027 | H-8->L+3 (77%)<br>H-21->LUMO (10%), H-12->LUMO (20%), H-3->L+2 (14%), H-2->L+3 (15%)                                     |
| 50 | 34994.8 | 285.8 | 0.0097 |                                                                                                                          |
| 51 | 35064.1 | 285.2 | 0.0208 | H-12->L+1 (18%), H-8->L+3 (18%)                                                                                          |
| 52 | 35256.1 | 283.6 | 0.0235 | H-3->L+2 (11%), H-2->L+3 (47%)                                                                                           |
| 53 | 35276.3 | 283.5 | 0.0022 | H-3->L+3 (58%), H-2->L+2 (15%)                                                                                           |
| 54 | 35358.5 | 282.8 | 0.0121 | H-13->LUMO (11%), H-12->LUMO (37%)                                                                                       |
| 55 | 35377.1 | 282.7 | 0.0832 | H-14->LUMO (14%), H-12->L+1 (52%)                                                                                        |
| 56 | 35713.4 | 280.0 | 0.0165 | H-1->L+6 (93%)                                                                                                           |
| 57 | 36094.9 | 277.0 | 0.0014 | H-15->LUMO (45%), H-14->L+1 (24%), H-13->LUMO (11%)                                                                      |
| 58 | 36119.9 | 276.9 | 0.0006 | H-15->L+1 (14%), H-14->LUMO (22%), H-13->L+1 (29%)                                                                       |
| 59 | 36283.7 | 275.6 | 0.0002 | H-7->L+3 (58%), H-6->L+2 (23%), H-6->L+3 (14%)                                                                           |
| 60 | 36290.1 | 275.6 | 0      | H-7->L+2 (22%), H-7->L+3 (14%), H-6->L+3 (58%)                                                                           |

**Table S5** Electronic transitions calculated for **4a**

| No. | Energy (cm <sup>-1</sup> ) | Wavelength (nm) | Osc. Strength | Major contribs                                                    |
|-----|----------------------------|-----------------|---------------|-------------------------------------------------------------------|
| 1   | 17879.7                    | 559.3           | 0.044         | H-6->L+2 (11%), HOMO->LUMO (77%)                                  |
| 2   | 18096.7                    | 552.6           | 0             | H-12->L+2 (17%), H-3->L+2 (27%), HOMO->L+2 (34%)                  |
| 3   | 18404.0                    | 543.4           | 0.007         | H-6->L+2 (82%), HOMO->LUMO (10%)                                  |
| 4   | 19074.2                    | 524.3           | 0             | H-14->L+2 (17%), H-2->L+2 (64%)                                   |
| 5   | 19258.1                    | 519.3           | 0.0325        | H-1->LUMO (24%), HOMO->L+1 (71%)                                  |
| 6   | 21501.9                    | 465.1           | 0.1542        | H-2->LUMO (52%), H-1->LUMO (36%)                                  |
| 7   | 21972.2                    | 455.1           | 0.0748        | H-3->LUMO (32%), H-1->L+1 (55%)                                   |
| 8   | 23051.3                    | 433.8           | 0.0003        | H-6->LUMO (99%)                                                   |
| 9   | 23067.5                    | 433.5           | 0.254         | H-3->L+1 (35%), H-2->LUMO (36%), H-1->LUMO (18%), HOMO->L+1 (10%) |
| 10  | 23232.8                    | 430.4           | 0.0008        | H-3->LUMO (12%), H-2->L+1 (82%)                                   |
| 11  | 24203.1                    | 413.2           | 0.0179        | H-5->L+1 (29%), H-4->LUMO (67%)                                   |
| 12  | 24227.3                    | 412.8           | 0.0003        | H-5->LUMO (68%), H-4->L+1 (31%)                                   |
| 13  | 24374.1                    | 410.3           | 0.719         | H-3->LUMO (48%), H-1->L+1 (30%)                                   |

|    |         |       |        |                                                      |
|----|---------|-------|--------|------------------------------------------------------|
| 14 | 24456.3 | 408.9 | 0.0001 | H-6->L+1 (99%)                                       |
| 15 | 25317.7 | 395.0 | 0.0059 | H-23->L+2 (83%)                                      |
| 16 | 25695.2 | 389.2 | 0.9775 | H-3->L+1 (56%), H-1->LUMO (19%), HOMO->L+1 (14%)     |
| 17 | 26112.2 | 383.0 | 0.0638 | H-8->L+1 (23%), H-7->LUMO (72%)                      |
| 18 | 26146.1 | 382.5 | 0.0135 | H-8->LUMO (72%), H-7->L+1 (25%)                      |
| 19 | 27108.3 | 368.9 | 0.2152 | H-9->LUMO (85%)                                      |
| 20 | 27209.9 | 367.5 | 0.0003 | H-5->LUMO (32%), H-4->L+1 (68%)                      |
| 21 | 27236.5 | 367.2 | 0.0029 | H-5->L+1 (69%), H-4->LUMO (30%)                      |
| 22 | 27529.3 | 363.2 | 0      | H-3->L+2 (22%), HOMO->L+2 (64%)                      |
| 23 | 27889.0 | 358.6 | 0      | H-1->L+2 (98%)                                       |
| 24 | 28454.4 | 351.4 | 0.071  | H-9->L+1 (39%), H-8->L+1 (45%), H-7->LUMO (11%)      |
| 25 | 28596.4 | 349.7 | 0.0022 | H-8->LUMO (23%), H-7->L+1 (72%)                      |
| 26 | 28707.7 | 348.3 | 0.023  | H-9->L+1 (57%), H-8->L+1 (27%), H-7->LUMO (12%)      |
| 27 | 29254.5 | 341.8 | 0      | H-10->LUMO (98%)                                     |
| 28 | 29372.3 | 340.5 | 0.0001 | H-11->LUMO (92%)                                     |
| 29 | 30657.1 | 326.2 | 0.0227 | H-11->L+1 (89%)                                      |
| 30 | 31381.4 | 318.7 | 0.0001 | H-12->LUMO (86%)                                     |
| 31 | 31512.1 | 317.3 | 0.0002 | H-10->L+1 (98%)                                      |
| 32 | 31762.1 | 314.8 | 0      | HOMO->L+3 (99%)                                      |
| 33 | 32795.3 | 304.9 | 0      | H-13->LUMO (99%)                                     |
| 34 | 33056.6 | 302.5 | 0      | H-1->L+3 (99%)                                       |
| 35 | 33078.4 | 302.3 | 0.0096 | H-12->L+1 (91%)                                      |
| 36 | 33097.8 | 302.1 | 0      | H-13->L+1 (98%)                                      |
| 37 | 33418.0 | 299.2 | 0.0009 | H-14->LUMO (75%), HOMO->L+4 (19%)                    |
| 38 | 33641.4 | 297.3 | 0.0001 | H-14->LUMO (17%), HOMO->L+4 (79%)                    |
| 39 | 34202.7 | 292.4 | 0      | H-9->L+2 (47%), H-3->L+2 (39%)                       |
| 40 | 34635.1 | 288.7 | 0.0118 | H-15->LUMO (71%), H-14->L+1 (24%)                    |
| 41 | 34837.5 | 287.0 | 0.0113 | H-15->LUMO (27%), H-14->L+1 (65%)                    |
| 42 | 35019.8 | 285.6 | 0.0005 | H-1->L+4 (95%)                                       |
| 43 | 35137.5 | 284.6 | 0      | H-16->LUMO (95%)                                     |
| 44 | 36102.2 | 277.0 | 0.0001 | H-4->L+2 (99%)                                       |
| 45 | 36154.6 | 276.6 | 0.0162 | H-5->L+2 (97%)                                       |
| 46 | 36241.7 | 275.9 | 0      | H-23->LUMO (14%), H-20->LUMO (14%), H-17->LUMO (58%) |
| 47 | 36495.0 | 274.0 | 0.0005 | H-11->L+2 (35%), H-7->L+2 (22%), H-2->L+2 (24%)      |

|    |         |       |        |                                                     |
|----|---------|-------|--------|-----------------------------------------------------|
| 48 | 36562.7 | 273.5 | 0.0021 | H-18->LUMO (28%), H-15->L+1 (68%)                   |
| 49 | 36816.8 | 271.6 | 0      | H-20->LUMO (33%), H-17->LUMO (11%), H-16->L+1 (45%) |
| 50 | 36940.2 | 270.7 | 0      | H-21->LUMO (27%), H-17->L+1 (67%)                   |
| 51 | 37156.3 | 269.1 | 0.0094 | H-19->LUMO (57%), HOMO->L+7 (33%)                   |
| 52 | 37202.3 | 268.8 | 0      | HOMO->L+5 (78%), HOMO->L+8 (10%)                    |
| 53 | 37231.4 | 268.6 | 0.0001 | HOMO->L+6 (85%)                                     |
| 54 | 37320.1 | 268.0 | 0.0096 | H-18->LUMO (57%), H-15->L+1 (30%)                   |
| 55 | 37331.4 | 267.9 | 0      | H-2->L+3 (96%)                                      |
| 56 | 37566.9 | 266.2 | 0.0002 | H-9->L+2 (17%), H-8->L+2 (73%)                      |
| 57 | 37714.5 | 265.2 | 0      | H-23->LUMO (60%), H-21->L+1 (13%), H-17->LUMO (10%) |
| 58 | 37857.2 | 264.2 | 0      | H-11->L+2 (15%), H-7->L+2 (75%)                     |
| 59 | 37941.1 | 263.6 | 0.0001 | H-3->L+3 (91%)                                      |
| 60 | 37987.9 | 263.2 | 0.0001 | HOMO->L+5 (10%), HOMO->L+8 (77%)                    |

**Table S6** Electronic transitions calculated for **5a**

| No. | Energy (cm <sup>-1</sup> ) | Wavelength (nm) | Osc. Strength | Major contribs                                                                    |
|-----|----------------------------|-----------------|---------------|-----------------------------------------------------------------------------------|
| 1   | 18607.2                    | 537.4           | 0.0583        | HOMO->LUMO (36%), HOMO->L+1 (47%)                                                 |
| 2   | 19129.1                    | 522.8           | 0.0759        | HOMO->LUMO (49%), HOMO->L+1 (34%)                                                 |
| 3   | 19896.1                    | 502.6           | 0             | H-3->L+5 (47%), HOMO->L+5 (31%)                                                   |
| 4   | 20263.9                    | 493.5           | 0.0003        | H-4->L+5 (88%)                                                                    |
| 5   | 20966.4                    | 477.0           | 0             | H-2->L+5 (77%)                                                                    |
| 6   | 22426.2                    | 445.9           | 0.1697        | H-3->LUMO (12%), H-1->LUMO (18%), H-1->L+1 (52%)                                  |
| 7   | 22811.8                    | 438.4           | 0.0838        | H-3->L+1 (14%), H-2->LUMO (41%), H-1->LUMO (24%), H-1->L+1 (11%)                  |
| 8   | 23240.9                    | 430.3           | 0.0004        | H-4->LUMO (35%), H-4->L+1 (64%)                                                   |
| 9   | 23410.2                    | 427.2           | 0.0008        | H-3->L+1 (10%), H-2->LUMO (31%), H-2->L+1 (51%)                                   |
| 10  | 23665.1                    | 422.6           | 0             | H-4->LUMO (64%), H-4->L+1 (35%)                                                   |
| 11  | 23790.1                    | 420.3           | 0.0946        | H-3->LUMO (16%), H-3->L+1 (12%), H-2->LUMO (20%), H-2->L+1 (30%), H-1->LUMO (12%) |
| 12  | 25510.5                    | 392.0           | 0.5795        | H-3->LUMO (48%), H-3->L+1 (21%), H-1->L+1 (11%)                                   |
| 13  | 26370.3                    | 379.2           | 1.0566        | H-3->LUMO (16%), H-3->L+1 (33%), H-1->LUMO (24%), HOMO->L+1 (10%)                 |
| 14  | 26636.5                    | 375.4           | 0.0063        | H-18->L+5 (95%)                                                                   |
| 15  | 26645.3                    | 375.3           | 0             | H-6->LUMO (12%), H-5->LUMO (85%)                                                  |
| 16  | 27001.8                    | 370.3           | 0             | H-6->L+1 (83%), H-5->L+1 (12%)                                                    |
| 17  | 27999.5                    | 357.1           | 0.0005        | H-7->LUMO (97%)                                                                   |

|    |         |       |        |                                                    |
|----|---------|-------|--------|----------------------------------------------------|
| 18 | 28398.8 | 352.1 | 0.0004 | H-8->L+1 (96%)                                     |
| 19 | 28556.1 | 350.2 | 0      | H-9->LUMO (42%), H-9->L+1 (46%)                    |
| 20 | 29598.1 | 337.9 | 0      | H-6->L+1 (13%), H-5->L+1 (84%)                     |
| 21 | 29719.9 | 336.5 | 0      | H-6->LUMO (85%), H-5->LUMO (12%)                   |
| 22 | 29853.0 | 335.0 | 0      | HOMO->L+2 (97%)                                    |
| 23 | 30306.3 | 330.0 | 0      | H-3->L+5 (22%), HOMO->L+5 (64%)                    |
| 24 | 30357.9 | 329.4 | 0.0005 | H-7->L+1 (96%)                                     |
| 25 | 30541.8 | 327.4 | 0.0125 | H-10->LUMO (24%), H-8->LUMO (67%)                  |
| 26 | 30568.4 | 327.1 | 0.0241 | H-10->LUMO (50%), H-10->L+1 (12%), H-8->LUMO (30%) |
| 27 | 30971.7 | 322.9 | 0.0145 | H-10->LUMO (19%), H-10->L+1 (78%)                  |
| 28 | 31022.5 | 322.3 | 0.0889 | HOMO->L+3 (79%), HOMO->L+4 (11%)                   |
| 29 | 31391.9 | 318.6 | 0      | H-1->L+5 (88%)                                     |
| 30 | 31516.1 | 317.3 | 0      | H-9->LUMO (55%), H-9->L+1 (43%)                    |
| 31 | 31820.2 | 314.3 | 0.0568 | HOMO->L+3 (15%), HOMO->L+4 (79%)                   |
| 32 | 31835.5 | 314.1 | 0      | H-1->L+2 (95%)                                     |
| 33 | 33334.9 | 300.0 | 0.0073 | H-1->L+3 (97%)                                     |
| 34 | 33444.6 | 299.0 | 0      | H-11->LUMO (72%), H-11->L+1 (27%)                  |
| 35 | 34216.5 | 292.3 | 0.0442 | H-12->LUMO (18%), H-12->L+1 (18%), H-1->L+4 (61%)  |
| 36 | 34336.6 | 291.2 | 0.0006 | H-11->LUMO (27%), H-11->L+1 (72%)                  |
| 37 | 35027.9 | 285.5 | 0.0301 | H-12->LUMO (66%), H-1->L+4 (26%)                   |
| 38 | 35090.0 | 285.0 | 0.1196 | H-12->LUMO (11%), H-12->L+1 (75%)                  |
| 39 | 35727.9 | 279.9 | 0      | HOMO->L+6 (97%)                                    |
| 40 | 36040.1 | 277.5 | 0      | H-2->L+2 (99%)                                     |
| 41 | 36094.9 | 277.0 | 0      | HOMO->L+7 (96%)                                    |
| 42 | 36494.2 | 274.0 | 0      | H-3->L+2 (98%)                                     |
| 43 | 36597.4 | 273.2 | 0.1284 | H-13->LUMO (14%), H-2->L+3 (34%), H-2->L+4 (34%)   |
| 44 | 36795.8 | 271.8 | 0      | H-18->LUMO (39%), H-18->L+1 (57%)                  |
| 45 | 36899.1 | 271.0 | 0.0906 | H-15->L+1 (16%), H-13->LUMO (16%), H-13->L+1 (32%) |
| 46 | 37046.7 | 269.9 | 0.0004 | H-4->L+3 (26%), H-4->L+4 (54%)                     |
| 47 | 37304.8 | 268.1 | 0      | H-18->LUMO (57%), H-18->L+1 (41%)                  |
| 48 | 37338.6 | 267.8 | 0      | H-4->L+2 (100%)                                    |
| 49 | 37350.7 | 267.7 | 0.0436 | H-13->LUMO (42%), H-3->L+3 (25%), H-3->L+4 (11%)   |
| 50 | 37523.3 | 266.5 | 0.0008 | H-3->L+3 (11%), H-2->L+3 (47%), H-2->L+4 (17%)     |
| 51 | 37657.2 | 265.6 | 0      | H-9->L+3 (17%), H-9->L+4 (54%)                     |

|    |         |       |        |                                                                                                         |
|----|---------|-------|--------|---------------------------------------------------------------------------------------------------------|
| 52 | 37704.8 | 265.2 | 0.0627 | H-13->L+1 (16%), H-3->L+3 (24%), H-2->L+4 (30%)                                                         |
| 53 | 37771.8 | 264.7 | 0.0026 | HOMO->L+10 (80%)                                                                                        |
| 54 | 37832.2 | 264.3 | 0.0214 | H-16->LUMO (26%), H-16->L+1 (13%), H-15->LUMO (11%), H-15->L+1 (16%), H-13->L+1 (13%), HOMO->L+10 (13%) |
| 55 | 37956.5 | 263.5 | 0.0012 | HOMO->L+9 (93%)                                                                                         |
| 56 | 38017.7 | 263.0 | 0.0375 | H-16->LUMO (16%), H-15->LUMO (12%), H-3->L+3 (27%), H-3->L+4 (12%)                                      |
| 57 | 38289.6 | 261.2 | 0.0104 | H-16->LUMO (16%), H-16->L+1 (11%), H-15->LUMO (14%), H-15->L+1 (24%), H-3->L+4 (21%)                    |
| 58 | 38387.2 | 260.5 | 0.0118 | H-15->LUMO (39%), H-3->L+4 (38%)                                                                        |
| 59 | 38506.5 | 259.7 | 0.0061 | H-17->L+1 (26%), H-16->L+1 (33%), H-14->LUMO (10%), H-14->L+1 (15%)                                     |
| 60 | 38688.0 | 258.5 | 0      | H-1->L+7 (88%)                                                                                          |

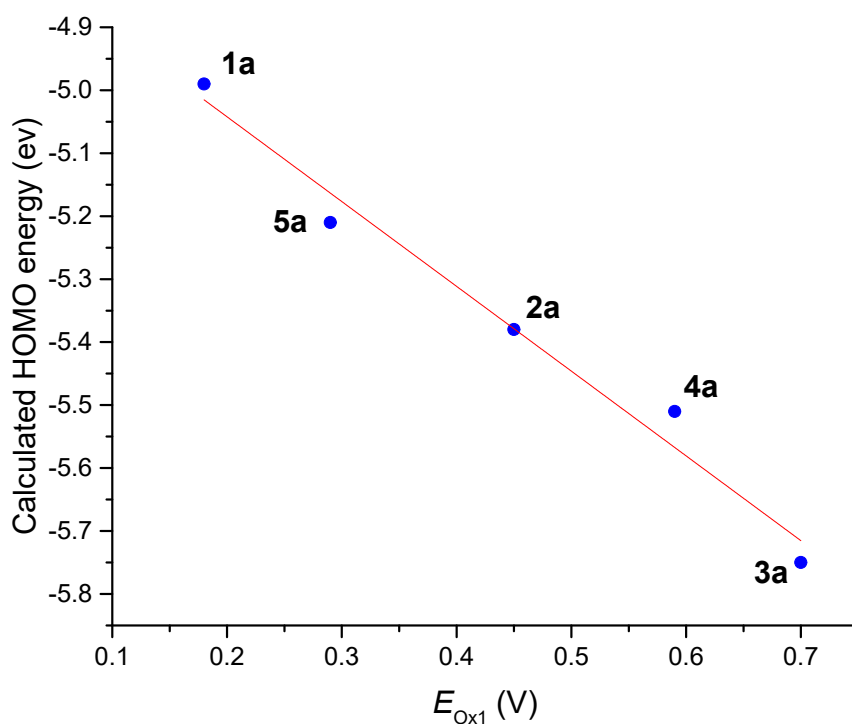

**Figure S56** Correlations of calculated HOMO energy with the first oxidation potentials for the compounds **1a-5a**.



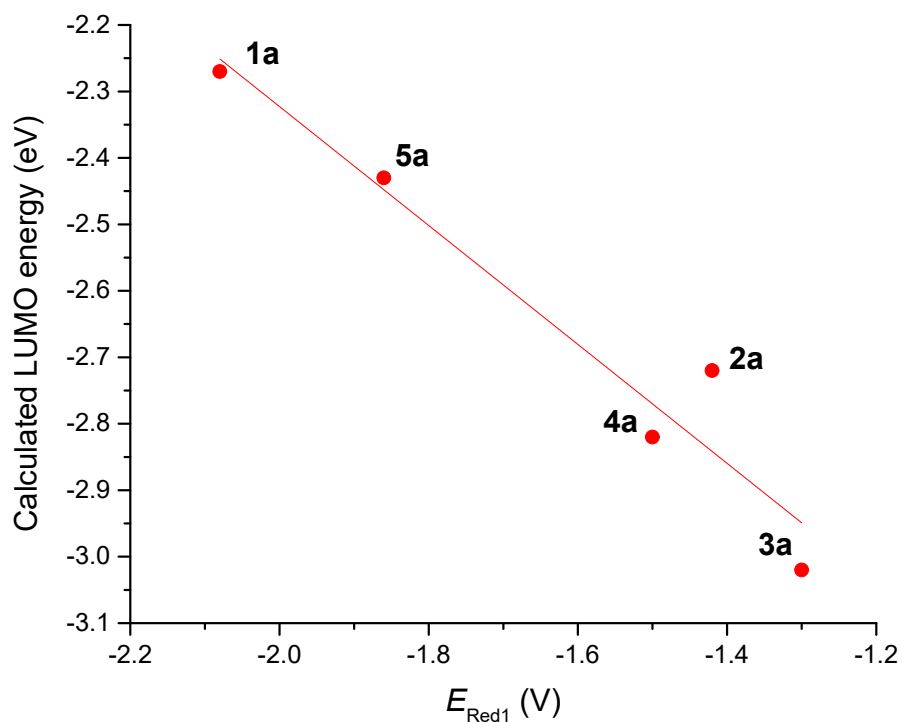

**Figure S57** Correlations of calculated LUMO energy with the first reduction potentials for the compounds **1a-5a**.

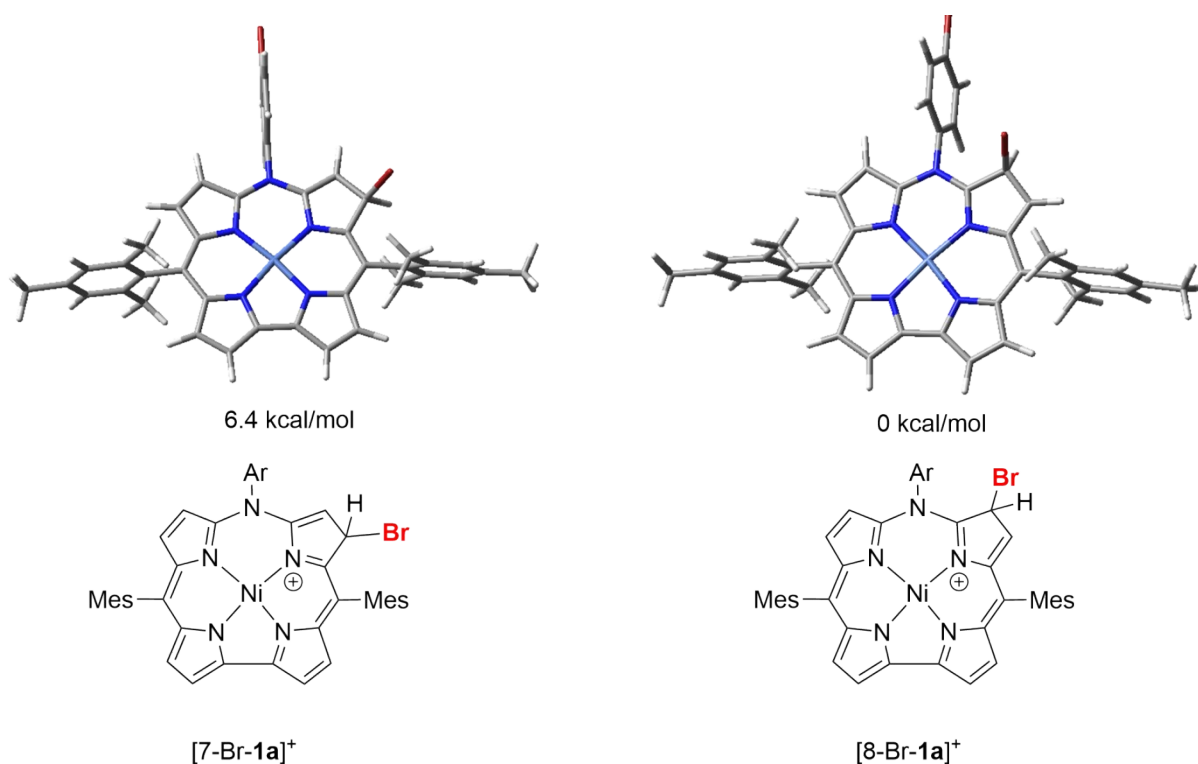

**Figure S58** DFT optimized models and relative energies of possible cationic intermediates that can be formed upon addition of one bromine atom in the C7 or C8 site.

**Table S7.** Computational details for the optimized structures of compounds using Gaussian<sup>1</sup> and NBO<sup>2</sup> software packages

| Structure /<br>Name <sup>[a]</sup> | SCF E         | ZPV <sup>[b]</sup> | lowest<br>freq.  | E             | $\Delta H$    | $\Delta G^{[c]}$ | HOMO | LUMO | HLG  |
|------------------------------------|---------------|--------------------|------------------|---------------|---------------|------------------|------|------|------|
|                                    | a.u.          | a.u.               | cm <sup>-1</sup> | a.u.          | a.u.          | a.u.             | eV   | eV   | eV   |
| <b>1a</b> /Azacor-OF_a             | -5975.541546  | -5974.888266       | 7.24             | -5974.845169  | -5974.844224  | -5974.971043     | 4.99 | 2.27 | 2.72 |
| <b>2a</b> /AzacorNO2-OF_a          | -6179.879760  | -6179.223692       | 7.73             | -6179.177988  | -6179.177043  | -6179.308791     | 5.36 | 2.72 | 2.64 |
| <b>3a</b> /Azacor2NO2-OF_a         | -6384.216142  | -6383.557340       | 12.67            | -6383.509010  | -6383.508066  | -6383.644684     | 5.74 | 3.02 | 2.72 |
| <b>4a</b> /                        |               |                    |                  |               |               |                  |      |      |      |
| AzacorBr6-OF_a                     | -21415.096807 | -21414.505078      | 7.05             | -21414.452161 | -21414.451217 | -21414.604130    | 5.52 | 2.82 | 2.70 |
| <b>5a</b> /AzacorAc-OF_a           | -6128.075675  | -6127.384978       | 12.98            | -6127.338282  | -6127.337338  | -6127.471184     | 5.21 | 2.43 | 2.78 |
| [8-Br-1a]* / AzacorBr+-OF_a        | -8549.179829  | -8548.524711       | 13.73            | -8548.479780  | -8548.478836  | -8548.609811     | -    | -    | -    |
| [7-Br-1a]* / AzacorBr+-OF_a2       | -8549.168509  | -8548.514201       | 6.97             | -8548.469181  | -8548.468236  | -8548.599608     | -    | -    | -    |

[a] Data set name (Cartesian coordinated available as \*.pdb files). [b] Zero-point vibrational energy. [c] Gibbs free energy.

[1] Gaussian 16, Revision C.01, Frisch, M. J.; Trucks, G. W.; Schlegel, H. B.; Scuseria, G. E.; Robb, M. A.; Cheeseman, J. R.; Scalmani, G.; Barone, V.; Petersson, G. A.; Nakatsuji, H.; Li, X.; Caricato, M.; Marenich, A. V.; Bloino, J.; Janesko, B. G.; Gomperts, R.; Mennucci, B.; Hratchian, H. P.; Ortiz, J. V.; Izmaylov, A. F.; Sonnenberg, J. L.; Williams-Young, D.; Ding, F.; Lipparini, F.; Egidi, F.; Goings, J.; Peng, B.; Petrone, A.; Henderson, T.; Ranasinghe, D.; Zakrzewski, V. G.; Gao, J.; Rega, N.; Zheng, G.; Liang, W.; Hada, M.; Ehara, M.; Toyota, K.; Fukuda, R.; Hasegawa, J.; Ishida, M.; Nakajima, T.; Honda, Y.; Kitao, O.; Nakai, H.; Vreven, T.; Throssell, K.; Montgomery, J. A., Jr.; Peralta, J. E.; Ogliaro, F.; Bearpark, M. J.; Heyd, J. J.; Brothers, E. N.; Kudin, K. N.; Staroverov, V. N.; Keith, T. A.; Kobayashi, R.; Normand, J.; Raghavachari, K.; Rendell, A. P.; Burant, J. C.; Iyengar, S. S.; Tomasi, J.; Cossi, M.; Millam, J. M.; Klene, M.; Adamo, C.; Cammi, R.; Ochterski, J. W.; Martin, R. L.; Morokuma, K.; Farkas, O.; Foresman, J. B.; Fox, D. J. Gaussian, Inc., Wallingford CT, 2016.

[2] NBO Version 3.1, E. D. Glendening, A. E. Reed, J. E. Carpenter, and F. Weinhold
